# Supplementary material for: Influence of hospital volume on nephrectomy mortality and complications: a systematic review and meta-analysis stratified by surgical type
Source: PubMed Central journal article supplement — BMJ Open. 2017 Sep 5;7(9):e016833. doi: 10.1136/bmjopen-2017-016833 (PMC5588977; doi:10.1136/bmjopen-2017-016833), 2017-09-05
Supplement: bmjopen-2017-016833.draft_revisions.pdf [file bmjopen-2017-016833.draft_revisions.pdf]

# BMJ Open

BMJ Open is committed to open peer review. As part of this commitment we make the peer review history of every article we publish publicly available.

When an article is published we post the peer reviewers' comments and the authors' responses online. We also post the versions of the paper that were used during peer review. These are the versions that the peer review comments apply to.

The versions of the paper that follow are the versions that were submitted during the peer review process. They are not the versions of record or the final published versions. They should not be cited or distributed as the published version of this manuscript.

BMJ Open is an open access journal and the full, final, typeset and author-corrected version of record of the manuscript is available on our site with no access controls, subscription charges or pay-per-view fees (<http://bmjopen.bmj.com>).

If you have any questions on BMJ Open's open peer review process please email [editorial.bmjopen@bmj.com](mailto:editorial.bmjopen@bmj.com)

# BMJ Open

## Influence of Hospital Volume on Nephrectomy Mortality and Complications: A Systematic Review and Meta-Analysis Stratified by Surgical Type

|                                 |                                                                                                                                                                                                                                                                                                                                                                                                                                                                                                                                                                                                                                                                                                                                                                                                           |
|---------------------------------|-----------------------------------------------------------------------------------------------------------------------------------------------------------------------------------------------------------------------------------------------------------------------------------------------------------------------------------------------------------------------------------------------------------------------------------------------------------------------------------------------------------------------------------------------------------------------------------------------------------------------------------------------------------------------------------------------------------------------------------------------------------------------------------------------------------|
| Journal:                        | <i>BMJ Open</i>                                                                                                                                                                                                                                                                                                                                                                                                                                                                                                                                                                                                                                                                                                                                                                                           |
| Manuscript ID                   | bmjopen-2017-016833                                                                                                                                                                                                                                                                                                                                                                                                                                                                                                                                                                                                                                                                                                                                                                                       |
| Article Type:                   | Research                                                                                                                                                                                                                                                                                                                                                                                                                                                                                                                                                                                                                                                                                                                                                                                                  |
| Date Submitted by the Author:   | 14-Mar-2017                                                                                                                                                                                                                                                                                                                                                                                                                                                                                                                                                                                                                                                                                                                                                                                               |
| Complete List of Authors:       | Hsu, Ray; University of Cambridge, Department of Surgery, Academic Urology Group; Cambridge University Hospitals NHS Foundation Trust, Department of Urology<br>Salika, Theodosia; University College London, Department of Epidemiology & Public Health, Health Behaviour Research Centre<br>Maw, Jonathan; Cambridge University Hospitals NHS Foundation Trust, Department of Urology<br>Lyratzopoulos, Georgios ; University College London, Department of Epidemiology & Public Health, Health Behaviour Research Centre<br>Gnanapragasam, Vincent; University of Cambridge, Department of Surgery, Academic Urology Group; Cambridge University Hospitals NHS Foundation Trust, Department of Urology<br>Armitage, James; Cambridge University Hospitals NHS Foundation Trust, Department of Urology |
| <b>Primary Subject Heading</b>: | Health services research                                                                                                                                                                                                                                                                                                                                                                                                                                                                                                                                                                                                                                                                                                                                                                                  |
| Secondary Subject Heading:      | Urology, Surgery                                                                                                                                                                                                                                                                                                                                                                                                                                                                                                                                                                                                                                                                                                                                                                                          |
| Keywords:                       | Hospital Volume, Nephrectomy, Nephrectomy Mortality, Nephrectomy Complications, Kidney & urinary tract disorders < UROLOGY, Urological tumours < UROLOGY                                                                                                                                                                                                                                                                                                                                                                                                                                                                                                                                                                                                                                                  |

SCHOLARONE™  
Manuscripts

1  
2  
3 **INFLUENCE OF HOSPITAL VOLUME ON NEPHRECTOMY MORTALITY AND COMPLICATIONS:**  
4  
5 **A SYSTEMATIC REVIEW AND META-ANALYSIS STRATIFIED BY SURGICAL TYPE**  
6  
7

8  
9  
10 Ray CJ Hsu,<sup>1,2</sup> Theodosia Salika,<sup>3</sup> Jonathan Maw,<sup>2</sup> Georgios Lyratzopoulos,<sup>3</sup> Vincent J  
11  
12 Gnanapragasam,<sup>1,2,†</sup> James N Armitage,<sup>2,†</sup>  
13  
14

15  
16  
17 <sup>1</sup>Academic Urology Group, Department of Surgery, University of Cambridge, Cambridge  
18  
19 Biomedical Campus, Hills Road, Cambridge, UK, CB2 0QQ  
20

21  
22 <sup>2</sup>Department of Urology, Addenbrooke's Hospital, Cambridge University Hospitals NHS  
23  
24 Foundation Trust, Hills Road, Cambridge, UK, CB2 0QQ  
25

26  
27 <sup>3</sup>Health Behaviour Research Centre, Department of Epidemiology and Public Health,  
28  
29 University College London, 1-19 Torrington Place, London, UK, WC1E 6BT  
30

31 <sup>†</sup>Joint senior authors.  
32  
33

34  
35  
36 Corresponding author: Ray CJ Hsu  
37

38 E-mail address: rch72@cam.ac.uk  
39  
40

41  
42  
43 Word count: 3,356  
44  
45  
46  
47  
48  
49  
50  
51  
52  
53  
54  
55  
56  
57  
58  
59  
60

## ABSTRACT

### Objectives

The provision of complex surgery is increasingly centralised to high volume specialist hospitals. Evidence to support nephrectomy centralisation however has been inconsistent. We conducted a systematic review and meta-analysis to determine the association between hospital case volumes and perioperative outcomes in radical nephrectomy, partial nephrectomy and nephrectomy with venous thrombectomy.

### Methods

Medline, Embase and the Cochrane Library were searched for relevant studies published between 1990 and 2016. Pooled effect estimates for nephrectomy mortality and complications were calculated for each nephrectomy type using the DerSimonian and Laird random-effect model. Sensitivity analyses were performed to examine the effects of heterogeneity on the pooled effect estimates by excluding studies with the heaviest weighting, lowest methodological score, and most likely to introduce misclassification bias.

### Results

Some 226,657 patients from nineteen publications were included in our review. Of these, sixteen were used in the meta-analysis. Considerable heterogeneity was noted across the included studies.

High volume hospitals were correlated with a 26% and 52% reduction in mortality for radical nephrectomy (OR 0.74, 95% CI 0.61-0.90,  $p < 0.01$ ) and nephrectomy with venous thrombectomy (OR 0.48, 95% CI 0.29-0.81,  $p < 0.01$ ) respectively. In addition, radical

1  
2  
3 nephrectomy in high volume hospitals was associated with an 18% reduction in  
4  
5 complications (OR 0.82, 95% CI 0.73-0.92,  $p<0.01$ ). No significant volume-outcome  
6  
7 relationship in mortality (OR 0.84, 95% CI 0.31-2.26,  $p=0.73$ ) or complications (OR 0.85, 95%  
8  
9 CI 0.55-1.30,  $p=0.44$ ) was observed for partial nephrectomy.  
10  
11  
12  
13

### 14 **Conclusions**

15  
16  
17 Our findings suggest that patients undergoing radical nephrectomy and nephrectomy with  
18  
19 venous thrombectomy have improved outcomes when treated by high volume hospitals.  
20  
21 Evidence of this in partial nephrectomy is however not yet clear and could be secondary to  
22  
23 the small patient number in our analyses. Further investigations are warranted to establish  
24  
25 the full potential of centralisation particularly as existing evidence is of low quality with  
26  
27 significant heterogeneity across studies.  
28  
29  
30  
31  
32  
33  
34  
35  
36  
37  
38  
39  
40  
41  
42  
43  
44  
45  
46  
47  
48  
49  
50  
51  
52  
53  
54  
55  
56  
57  
58  
59  
60

### STRENGTH & LIMITATIONS OF THIS STUDY

- This is a contemporary systematic review and meta-analysis of the associations between hospital case volumes and nephrectomy outcomes.
- Estimates were synthesised from seventeen studies, four folds greater than previous meta-analysis, and the study is the first to date to stratified results based on the types of nephrectomy to account for differences in technical complexity and rates of adverse outcomes.
- Multiple sensitivity and subgroup analyses were performed to assess the potential bias and confounders introduced.
- Current evidence in nephrectomy outcome-volume relationship is of low quality and considerable heterogeneity exists between studies in design, type of data used, outcomes measured and statistical methodologies.
- Our study highlights the limitations in existing evidence and suggests questions that should be addressed in future research.

## INTRODUCTION

In recent years, there has been an emerging trend for the centralisation of complex operations in healthcare systems around the world [1–3]. This shift is supported by the growing research and evidence suggesting that hospitals and surgeons with high case loads have better patient outcomes [4–8]. Proponents argue that centralisation allows more effective use of clinical expertise and specialist equipment, and the increased exposure improves surgical skills and provides better training opportunities. Centralisation can also facilitate quicker adoption of care pathways, such as enhanced recovery, and may have more long-term financial sustainability for hospitals. However, differences in disease biology and surgical complexity mean that such a health service model may not be appropriate for all conditions.

Nephrectomy plays a key role in the management of many renal conditions and is often the only potentially curative treatment for renal cancer patients. Advancements in surgical techniques and technology have led to different nephrectomy types, such as partial nephrectomy, with different surgical complexities and outcomes [9,10]. With over 330,000 new annual renal cancer diagnoses worldwide and rising incidence in many countries, the number of nephrectomies being performed is also likely to increase [11,12]. It is therefore critical that health service providers understand the effects that organisational changes may have on patient outcomes. Despite the expansion on volume-outcome research, no consensus has been reached on the efficacy of centralising nephrectomy, and many uncertainties remain about its potential benefits. We present a contemporary systematic review and meta-analysis of the published literature on the association between hospital

1  
2  
3 case volumes and perioperative outcomes stratified by nephrectomy types. We hypothesise  
4  
5 that outcomes significantly improve with higher nephrectomy case volumes.  
6  
7  
8  
9  
10  
11  
12  
13  
14  
15  
16  
17  
18  
19  
20  
21  
22  
23  
24  
25  
26  
27  
28  
29  
30  
31  
32  
33  
34  
35  
36  
37  
38  
39  
40  
41  
42  
43  
44  
45  
46  
47  
48  
49  
50  
51  
52  
53  
54  
55  
56  
57  
58  
59  
60



## METHODS

### Search criteria & data extraction

The systematic review and meta-analysis was performed in accordance to the Preferred Reporting Items for Systematic Reviews and Meta-Analyses (PRISMA) guidelines (S1 Appendix) [13]. Literature searches in Medline, Embase and the Cochrane Library were performed for relevant studies published between January 1990 and December 2016.

Studies published prior to 1990 were not considered as recent medical and surgical advancements would have limited their applicability to the modern healthcare system.

Databases were searched using medical subject heading (MeSH) terms and key words for nephrectomy, case volume and relevant outcomes (S2 Appendix). We considered only studies published in English and used primary data to examine nephrectomy outcomes in adult populations across two or more hospital case volumes. Only those investigating radical or partial nephrectomy were included and articles comprised solely of nephroureterectomy were excluded.

Two investigators (R.C.J.H and J.M.) independently reviewed all studies for validity and data extraction. References were also searched manually for additional relevant studies. Any disagreement between the two reviewers was resolved by discussion and consultation with a third reviewer (J.N.A.). Where only rates of outcomes were presented, these were applied to the case number to give the number of events, within the error of the published results. Study authors were contacted for further clarification if specific rates of outcomes and case numbers were not published [14,15].

1  
2  
3 As the cut-off values for hospital volume groups differed among studies, we used the  
4  
5 approach adopted by similar previous meta-analyses by evenly dichotomising groups into  
6  
7 low volume (LV) and high volume (HV) when articles presented a series of volume groupings  
8  
9 [16,17]. If a study presented an odd number of volume groups, the middle group was  
10  
11 categorised as LV.  
12  
13

14  
15  
16  
17 Methodological quality and potential risk of bias were scored using a validated system  
18  
19 designed specifically for the evaluation of volume-outcome studies [18,19]. When studies  
20  
21 extracted data from the same source with overlap in the studied periods, we employed the  
22  
23 following rules to avoid duplicating populations: 1) studies with identical patient cohort but  
24  
25 examining different outcomes were considered and analysed separately; 2) studies that  
26  
27 derived data from older datasets were excluded in favour of the more contemporary cohort;  
28  
29 3) if the above rules were not applicable, studies with the lower methodological quality  
30  
31 scores were excluded; 4) where quality scores were equal, the study covering the longest  
32  
33 period was included.  
34  
35  
36  
37  
38  
39

#### 40 **Quantitative data synthesis**

41  
42 All statistical analyses were performed using Stata 14 [20]. Nephrectomy types were  
43  
44 categorised into radical nephrectomy, partial nephrectomy and nephrectomy with venous  
45  
46 thrombectomy and analysed separately. Studies involving multiple types of nephrectomies  
47  
48 were analysed based on the aforementioned groups, but if this was not feasible, they were  
49  
50 categories as radical nephrectomy. With the assumption that a distribution of effects exists  
51  
52 amongst studies, all pooled effect size were calculated using the DerSimonian and Laird  
53  
54 random-effect model, which provided more conservative estimates. Odds ratio (OR) and  
55  
56  
57  
58  
59  
60

1  
2  
3 95% confidence interval (CI) were calculated for each outcome measure using LV groups as  
4  
5 the reference. Pooled effect size was calculated for nephrectomy mortality and  
6  
7 complications.  
8  
9

10  
11  
12 When the meta-analysis demonstrated significantly better outcomes in HV hospitals, we  
13  
14 quantified the clinical effectiveness of centralisation by calculating the numbers needed to  
15  
16 treat, or in our case numbers needed to centralise (NNC). NNC represents the number of  
17  
18 cases that will need to be treated by HV hospitals in order to prevent one event.  
19  
20  
21  
22  
23

### 24 **Heterogeneity**

25  
26 As the DerSimonian and Laird model would have only accounted for some between-study  
27  
28 heterogeneity, we further quantified heterogeneity by calculating  $I^2$  statistic.  $I^2$  provides an  
29  
30 easily understood number, which describes the proportion of total variation in estimates  
31  
32 that is due to heterogeneity rather than chance [21]. Values of 25% or lower denote low  
33  
34 heterogeneity and values of 75% or greater denote considerable heterogeneity [22]. Meta-  
35  
36 regression was performed to explore the influence of potential explanatory variables on  
37  
38 heterogeneity including each study's publication year, country, data source, number of  
39  
40 patients and their demographics, number of hospitals, and threshold for HV hospitals.  
41  
42  
43  
44  
45  
46  
47

### 48 **Publication bias**

49  
50 Funnel plots were generated to investigate potential publication bias, and were enhanced to  
51  
52 include contours that divide the funnel into statistically significant and non-significant areas.  
53  
54  
55 Funnel plot symmetry suggests low probability of publication bias and Harbord's modified  
56  
57  
58  
59  
60

1  
2  
3 test was used to test for asymmetry [23]. Harbord's test reduces false positive rates when  
4  
5 applied to binary outcome data, especially when there is low between-study heterogeneity.  
6  
7 Trim and fill method was also performed to account for publication bias by adjusting the  
8  
9 meta-analysis to incorporate the theoretically missing studies [24].  
10  
11

### 12 13 14 15 **Sensitivity analysis**

16  
17 To examine specific studies' effects on pooled effect size, sensitivity analyses were  
18  
19 performed by excluding individual studies and repeating the meta-analyses. We examined  
20  
21 the effects of studies with the heaviest weighting and studies with the lowest  
22  
23 methodological quality score. As there is currently no consensus on what nephrectomy case  
24  
25 volume is necessary to be considered as HV, we repeated our analyses by excluding studies  
26  
27 whose standardised HV categories overlapped most significantly with the standardised LV  
28  
29 categories in other studies to account for potential bias of misclassifying volume categories  
30  
31 in our dichotomy.  
32  
33  
34  
35  
36  
37

38 As secondary analyses, we additionally repeated the meta-analysis three further times with  
39  
40 different methods of dichotomising the volume groups to examine whether our initial  
41  
42 estimates would remain consistent. The methods of dichotomising were 1) lowest volume  
43  
44 categories and all others 2) even dichotomy and when studies present an odd number of  
45  
46 volume categories, the middle group was considered as HV 3) highest volume categories and  
47  
48 all others.  
49  
50  
51  
52  
53  
54  
55  
56  
57  
58  
59  
60

## RESULTS

### Study selection & characteristics

From the 5,680 articles initially identified, 19 were included in the systematic review containing 226,657 patients from seven countries (Figure 1). For the meta-analysis, eleven studies with 201,506 patients examining radical nephrectomy was included while four studies of 23,617 patients and two studies of 1,249 patients examining partial nephrectomy and nephrectomy with venous thrombectomy were included respectively. Publication year ranged from 2002 to 2016, while cohort periods covered from 1993 to 2013.

Tables 1 summarises the characteristics of the included studies. Variations were observed in study designs including source of data and outcomes measured. Out of a possible score of 18, the median quality score from the included studies was 8.5 (interquartile range 8 – 9) with the majority of the studies failing to adequately address potential confounders including measuring the appropriateness of patient selection, adjusting for case-mix variations and accounting for differences in clinical risks and processes of care. Variable thresholds for HV hospitals were noted across the included studies.

**Table 1.** Characteristics and methodological summary of studies.

| Reference                       | Study Characteristics |         |           |           |                 |                  |                  |                   | Outcomes Measured |                                                                                                                             |             |     |             |               | Case Mix                                                                       | Quality Score (18) |
|---------------------------------|-----------------------|---------|-----------|-----------|-----------------|------------------|------------------|-------------------|-------------------|-----------------------------------------------------------------------------------------------------------------------------|-------------|-----|-------------|---------------|--------------------------------------------------------------------------------|--------------------|
|                                 | Year                  | Country | Period    | Data Type | No. of Patients | No. of Hospitals | Low <sup>a</sup> | High <sup>a</sup> | Mortality         | Complications (breakdowns)                                                                                                  | Transfusion | LOS | Conversions | Others        |                                                                                |                    |
| <b>Radical Nephrectomy</b>      |                       |         |           |           |                 |                  |                  |                   |                   |                                                                                                                             |             |     |             |               |                                                                                |                    |
| Hjelle[25]                      | 2016                  | Norway  | 2008-2013 | Admin     | 3,273           | 40               | 20               | 40                | +                 | -                                                                                                                           | -           | -   | +           | -             | Demographics, tumour stage, nephrectomy type                                   | 8                  |
| Becker[26]/Sun[27] <sup>b</sup> | 2014 / 2012           | USA     | 1998-2007 | Admin     | 48,172          | N/S              | 5                | 16                | +                 | + (17 events inc haemorrhage, cardiac arrest, infection, wound disruption, seroma, pneumothorax, VTE etc)                   | +           | +   | -           | -             | Demographics, co-morbidity, nephrectomy type, laparoscopy, payer/hospital type | 9                  |
| Hanchanale[268]                 | 2010                  | England | 1998-2005 | Admin     | 20,672          | 1,181            | 14               | 35                | +                 | -                                                                                                                           | -           | +   | -           | -             | Demographics                                                                   | 9                  |
| Yasunaga[29]                    | 2010                  | Japan   | 2006-2007 | Admin     | 7,988           | 646              | 26               | 65                | +                 | + (11 events inc surgical site infection, UTI, VTE, sepsis, ileus, stroke, cardiac events, renal, failure, peritonitis etc) | -           | -   | -           | -             | Demographics, co-morbidity, laparoscopy, hospital type, tumour location        | 9                  |
| Mitchell[30]                    | 2009                  | USA     | 2003-2007 | Clinical  | 42,988          | 134              | 99/4.5yr         | 500/4.5yr         | +                 | + (not specified)                                                                                                           | -           | +   | -           | ICU admission | None                                                                           | 9                  |
| Yasunaga[14]                    | 2008                  | Japan   | 2006-2007 | Clinical  | 1,704           | 461              | 9                | 40                | +                 | + (wound infection, pneumonia, ileus, renal dysfunction, others)                                                            | -           | -   | -           | OT, EBL       | Demographics, co-morbidity, laparoscopy, tumour stage & location               | 11                 |
| Davenport[31]                   | 2005                  | England | 2004      | Clinical  | 598             | 48               | <1/mo            | >1/mo             | +                 | + (12 events inc bleeding, bowel injury, GI bleed, renal failure, pneumothorax, VTE, MI, splenic injury etc)                | +           | -   | +           | OT            | None                                                                           | 4                  |
| Keoghane[32]                    | 2004                  | England | 2001-2002 | Clinical  | 263             | 25               | 5                | 6                 | -                 | + (16 events inc renal failure, sepsis, wound infection, bowel injury, incisional hernia, perihaptic collection etc)        | -           | -   | +           | -             | None                                                                           | 3                  |
| Taub[33]                        | 2004                  | USA     | 1993-1997 | Admin     | 16,858          | 962              | 14               | 34                | +                 | -                                                                                                                           | -           | +   | -           | -             | Demographics, co-morbidity, admission acuity                                   | 8                  |
| Goodney[34]                     | 2003                  | USA     | 1994-1999 | Admin     | 58,990          | 3,292            | 6                | 33                | -                 | -                                                                                                                           | -           | +   | -           | Readmission   | Demographics, co-morbidity, admission acuity                                   | 8                  |
| Birkmeyer[35]                   | 2002                  | USA     | 1994-1999 | Admin     | 58,990          | 3,292            | 6                | 33                | +                 | -                                                                                                                           | -           | -   | -           | -             | Demographics, co-morbidity, admission acuity                                   | 7                  |
| <b>Partial Nephrectomy</b>      |                       |         |           |           |                 |                  |                  |                   |                   |                                                                                                                             |             |     |             |               |                                                                                |                    |

|    |                                             |      |        |           |          |        |     |          |          |   |                                                                                                                     |   |   |   |                                   |                                                          |    |
|----|---------------------------------------------|------|--------|-----------|----------|--------|-----|----------|----------|---|---------------------------------------------------------------------------------------------------------------------|---|---|---|-----------------------------------|----------------------------------------------------------|----|
| 1  |                                             |      |        |           |          |        |     |          |          |   |                                                                                                                     |   |   |   |                                   |                                                          |    |
| 2  |                                             |      |        |           |          |        |     |          |          |   |                                                                                                                     |   |   |   |                                   |                                                          |    |
| 3  |                                             |      |        |           |          |        |     |          |          |   |                                                                                                                     |   |   |   |                                   |                                                          |    |
| 4  | Porpiglia[36]                               | 2016 | Italy  | 2009-2013 | Clinical | 285    | 22  | 49       | 50       | - | -                                                                                                                   | - | - | - | Trifecta <sup>c</sup>             | Tumour growth patter, EBL                                | 6  |
| 5  |                                             |      |        |           |          |        |     |          |          |   |                                                                                                                     |   |   |   |                                   |                                                          |    |
| 6  | Couapel[37]                                 | 2014 | France | 2010      | Clinical | 570    | 53  | 4/7mo    | 19/7mo   | + | + (medical and surgical events, not further specified)                                                              | - | + | + | OT, EBL, Totalisation, +ve margin | N/S                                                      | 8  |
| 7  |                                             |      |        |           |          |        |     |          |          |   |                                                                                                                     |   |   |   |                                   |                                                          |    |
| 8  |                                             |      |        |           |          |        |     |          |          |   |                                                                                                                     |   |   |   |                                   |                                                          |    |
| 9  | Monn[38]                                    | 2014 | USA    | 2009-2011 | Admin    | 17,583 | 322 | 13       | 35       | - | + (organ based complications not further specified, pain, seroma, shock, haematoma, hypotension, VTE, pneumothorax) | + | + | - | Hospital cost                     | Demographics, co-morbidity, payer, region, hospital type | 9  |
| 10 |                                             |      |        |           |          |        |     |          |          |   |                                                                                                                     |   |   |   |                                   |                                                          |    |
| 11 | Abouassaly[39]                              | 2012 | Canada | 1998-2008 | Admin    | 4,292  | 181 | 146/10yr | 797/10yr | + | + (not specified)                                                                                                   | - | - | - | -                                 | Demographics, co-morbidity, region                       | 12 |
| 12 |                                             |      |        |           |          |        |     |          |          |   |                                                                                                                     |   |   |   |                                   |                                                          |    |
| 13 | Taub[33]                                    | 2004 | USA    | 1993-1997 | Admin    | 1,172  | 962 | 14       | 34       | + | -                                                                                                                   | - | + | - | -                                 | Demographics, co-morbidity, admission acuity             | 8  |
| 14 |                                             |      |        |           |          |        |     |          |          |   |                                                                                                                     |   |   |   |                                   |                                                          |    |
| 15 |                                             |      |        |           |          |        |     |          |          |   |                                                                                                                     |   |   |   |                                   |                                                          |    |
| 16 |                                             |      |        |           |          |        |     |          |          |   |                                                                                                                     |   |   |   |                                   |                                                          |    |
| 17 | <b>Nephrectomy with Venous Thrombectomy</b> |      |        |           |          |        |     |          |          |   |                                                                                                                     |   |   |   |                                   |                                                          |    |
| 18 |                                             |      |        |           |          |        |     |          |          |   |                                                                                                                     |   |   |   |                                   |                                                          |    |
| 19 | Toren[40]                                   | 2013 | Canada | 1998-2008 | Admin    | 816    | 120 | N/S      | N/S      | + | + (40 medical and surgical events inc MI, CHF, PE, infection, organ injury, pneumothorax etc)                       | + | - | - | -                                 | Demographics, co-morbidity, region                       | 11 |
| 20 |                                             |      |        |           |          |        |     |          |          |   |                                                                                                                     |   |   |   |                                   |                                                          |    |
| 21 | Yap[15]                                     | 2012 | Canada | 1995-2004 | Admin    | 433    | N/S | 2/10yr   | 8/10yr   | + | -                                                                                                                   | - | - | - | -                                 | Demographics                                             | 11 |
| 22 |                                             |      |        |           |          |        |     |          |          |   |                                                                                                                     |   |   |   |                                   |                                                          |    |

<sup>a</sup>Low, cut-off value for lowest volume group; high, cut-off value for highest-volume group. Volume units are cases per year unless specified. <sup>b</sup>Becker and Sun were equal in the data source used, outcomes evaluated, periods covered and quality scores, but employed different analyses to evaluate the benefit of regionalisation and volume-outcome relationship in nephrectomy [26,27]. <sup>c</sup>Trifecta was defined as simultaneous absence of complications, negative surgical margins and ischemic time of <25 minutes. We therefore treated them as one single cohort, with no duplicates in our analysis. Admin: Administrative. N/S: Not specified. RN: Radical nephrectomy. PN: Partial nephrectomy. VTE: venous thromboembolism. MI: Myocardial infarction. CHF: Congestive heart failure. PE: Pulmonary embolism. UTI: Urinary tract infection. GI: Gastrointestinal. OT: Operating time. EBL: Estimated blood loss. ICU: Intensive care unit.

## Mortality and Hospital Volumes

Post-operative mortality was the most frequently examined outcome, reported in fourteen studies. Ten studies reported mortality in radical nephrectomy [14,25–31,33], three in partial nephrectomy [33,37,39] and two in nephrectomy with venous thrombectomy [15,40]. The overall mortality was 1.59% (range 0.20-7.2) with mortality rates in HV and LV hospitals being 1.47% and 1.68% respectively.

### *Radical Nephrectomy*

Meta-analysis demonstrated that patients who underwent radical nephrectomy in HV hospitals had a 26% reduction (OR 0.74, 95% CI 0.61-0.90,  $p < 0.01$ ) in post-operative mortality, corresponding to a NNC of 234 (Figure 2A). Significant heterogeneity was observed ( $I^2$  75.0%,  $p < 0.01$ ). Meta-regression was performed to investigate the potential explanatory variables for heterogeneity, and only differences in the threshold values for HV hospitals were shown to be a significant contributor (S3 Appendix A). Subgroup analysis of the three studies examining exclusively of radical nephrectomies demonstrated a more pronounced reduction in post-operative mortality favouring HV hospitals (OR 0.62, 95% CI 0.53-0.71,  $p < 0.01$ ) [14,30,33]. This corresponded to a lower NNC of 166 with little residual heterogeneity ( $I^2$  0.0 %,  $p = 0.40$ ). The overall funnel plot was visually asymmetrical particularly missing studies with effect estimates favouring LV hospitals (Figure 3A). However, the Harbord's modified test did not show significant asymmetry ( $p = 0.40$ ) and "trim and fill" method did not change the initial estimate, indicating no clear evidence of publication bias. In sensitivity analyses, exclusion of the most heavily weighted study led to a similar pooled-effect estimate (OR 0.70, 95% CI 0.55-0.88,  $p < 0.01$ ) [35]. Exclusion of the study with the lowest quality score also did not significantly alter our result (OR 0.74, 95% CI 0.61-0.91,



1  
2  
3 p<0.01) [31]. To examine the potential bias introduced by misclassification, two cohorts  
4  
5 were excluded [26,27,31]. This did not substantially change our pooled-effect estimate  
6  
7 either (OR 0.73, 95% CI 0.58-0.93, p=0.01). Overall, radical nephrectomies in HV hospitals  
8  
9 appeared to have significantly lower mortality.  
10  
11

### 12 13 14 15 *Partial Nephrectomy*

16  
17 Meta-analysis showed that partial nephrectomy patients operated in HV hospitals had a 16%  
18  
19 reduction in post-operative mortality but this was not statistically significant (OR 0.84, 95%  
20  
21 CI 0.31-2.26, p=0.73) (Figure 2B). Moderate but non-significant heterogeneity was noted ( $I^2$   
22  
23 36.84 %, p=0.21). Sensitivity analyses removing studies with the heaviest weighting [39] or  
24  
25 most likely to introduce misclassification bias [37] demonstrated reduced mortality  
26  
27 favouring HV hospitals, but these remained non-significant.  
28  
29  
30  
31  
32

### 33 34 *Nephrectomy with Venous Thrombectomy*

35  
36 Patients who underwent nephrectomy with venous thrombectomy in HV hospitals had a  
37  
38 52% reduction (OR 0.48, 95% CI 0.29-0.81, p<0.01) in short-term mortality compared to LV  
39  
40 hospitals (Figure 2C). This corresponded to a NNC of 25 with low heterogeneity ( $I^2$  0.0 %,  
41  
42 p=0.50). Due to the small number of studies reporting this outcome, further testing of  
43  
44 heterogeneity and publication bias was not expected to generate meaningful results and this  
45  
46 was not attempted.  
47  
48  
49  
50  
51

### 52 53 **Complications and Hospital Volumes**

54  
55 Complication was the second most frequently investigated outcome, reported in ten studies.  
56  
57 Six studies reported complications in radical nephrectomy [26,27,29–32] and three in partial  
58  
59  
60

1  
2  
3 nephrectomy [37–39]. Only one study examined volume-outcome relationship in  
4  
5 nephrectomy with venous thrombectomy and meta-analysis was therefore not appropriate  
6  
7 [40]. The overall complication rate was 16.26% (range 7.4-78). HV hospitals had complication  
8  
9 rates of 15.00% compared to 17.51% in LV hospitals.

### 14 15 *Radical Nephrectomy*

16  
17 Meta-analysis showed a 18% reduction (OR 0.82, 95% CI 0.73-0.92,  $p < 0.01$ ) in nephrectomy  
18  
19 complications in HV centres, corresponding to a NNC of 38 (Figure 4A). Significant  
20  
21 heterogeneity was noted ( $I^2$  76.25%,  $p < 0.01$ ), but none of the factors examined in meta-  
22  
23 regression significantly contributed to this (S3 Appendix B). Funnel plot was visually  
24  
25 asymmetrical, but using the “trim and fill” method to account for potentially missing studies  
26  
27 resulted in similar pooled-effect estimate (OR 0.81, 95% CI 0.72-0.91,  $p < 0.01$ ) (Figure 3B).  
28  
29 Harbord’s test also did not find significant funnel plot asymmetry to suggest publication bias  
30  
31 ( $p = 0.18$ ). Sensitivity analyses by removing studies with the lowest quality [32] or most likely  
32  
33 to introduce misclassification bias [31,32] did not significantly alter our initial result.  
34  
35  
36 Excluding study with the heaviest weighting however led to a loss of significance in the  
37  
38 pooled-effect estimate, which however still demonstrated a 11% reduction in complications  
39  
40 in HV hospitals (OR 0.89, 95% CI 0.74-1.08,  $p = 0.24$ ). Overall, radical nephrectomies  
41  
42 performed in HV hospitals appeared to have significantly lower complications compared to  
43  
44  
45  
46  
47  
48 LV hospitals.

### 52 53 *Partial Nephrectomy*

54  
55 Partial nephrectomy patients operated in HV hospitals had a 15% reduction in complications,  
56  
57 but this was not statistically significant (OR 0.85, 95% CI 0.55-1.30,  $p = 0.44$ ) (Figure 4B).  
58  
59  
60

1  
2  
3 Significant heterogeneity was noted ( $I^2$  94.80%,  $p < 0.01$ ). Sensitivity analysis by removing  
4  
5 studies with the heaviest weighting [38] or most likely to introduce misclassification bias [37]  
6  
7 did not result in significance.  
8  
9

### 10 11 12 **Secondary analyses using different methods of dichotomising HV and LV** 13

14  
15 As there is no consensus on what constituted HV hospitals in current evidence, simple  
16  
17 dichotomy of volume groups may introduce inherent bias to the estimates. Yet no  
18  
19 recommendation on how best to proceed in volume-outcome analysis presently exists.  
20  
21 In our secondary analyses, we consistently observed significantly lower risks of mortality for  
22  
23 both radical nephrectomy and nephrectomy with venous thrombectomy in HV hospitals  
24  
25 regardless how volumes were dichotomies (Table 2). The magnitudes of risk reductions were  
26  
27 more pronounced when higher thresholds for HV hospitals were considered particularly for  
28  
29 radical nephrectomy mortality. Partial nephrectomy mortality however continued to  
30  
31 demonstrate no significant association to volume even when dichotomies were comparing  
32  
33 the highest volume groups to all others.  
34  
35  
36  
37  
38  
39

40  
41 Risks of radical nephrectomy complications remained significantly reduced in HV hospitals  
42  
43 when the dichotomy threshold for HV hospitals was increased, but the significance was lost  
44  
45 when the thresholds were lowered. Association between hospital volumes and partial  
46  
47 nephrectomy complications remained insignificant regardless of how HV was defined in our  
48  
49 dichotomy.  
50  
51  
52  
53  
54  
55  
56  
57  
58  
59  
60

**Table 2:** Results of meta-analysis by using different methods of dichotomising volume groups.

|                                      | Lowest volume group vs. all others     | Even dichotomy, middle group as HV    | Even dichotomy, middle group as LV (Primary analysis) | Highest volume group vs. all others   |
|--------------------------------------|----------------------------------------|---------------------------------------|-------------------------------------------------------|---------------------------------------|
| <b>Mortality</b>                     |                                        |                                       |                                                       |                                       |
| Radical Nephrectomy                  | OR: 0.82<br>95%CI 0.71-0.94<br>p=0.01  | OR: 0.83<br>95%CI 0.72-0.95<br>p<0.01 | OR: 0.74<br>95%CI 0.61-0.90<br>p<0.01                 | OR: 0.72<br>95%CI 0.61-0.85<br>p<0.01 |
| Partial Nephrectomy                  | OR: 0.48<br>95%CI 0.18-1.31<br>p=0.15  | OR: 0.67<br>95%CI 0.17-2.75<br>p=0.58 | OR: 0.84<br>95%CI 0.31-2.26<br>p=0.73                 | OR: 0.93<br>95%CI 0.31-2.77<br>p=0.90 |
| Nephrectomy with Venous Thrombectomy | OR: 0.59<br>95%CI 0.35-0.99<br>p=0.045 | OR: 0.46<br>95%CI 0.27-0.80<br>p<0.01 | OR: 0.48<br>95%CI 0.29-0.81<br>p=0.01                 | OR: 0.48<br>95%CI 0.25-0.92<br>p=0.03 |
| <b>Complications</b>                 |                                        |                                       |                                                       |                                       |
| Radical Nephrectomy                  | OR: 0.89<br>95%CI 0.78-1.01<br>p=0.07  | OR: 0.84<br>95%CI 0.68-1.05<br>p=0.13 | OR: 0.82<br>95%CI 0.73-0.92<br>p<0.01                 | OR: 0.82<br>95%CI 0.73-0.92<br>p<0.01 |
| Partial Nephrectomy                  | OR: 0.82<br>95%CI 0.55-1.41<br>p=0.60  | OR: 0.80<br>95%CI 0.47-1.36<br>p=0.40 | OR: 0.85<br>95%CI 0.55-1.30<br>p=0.44                 | OR: 0.81<br>95%CI 0.53-1.24<br>p=0.33 |

## DISCUSSION

Evidence on volume-outcome relationships in complex diseases and procedures has increased substantially in recent years. Many operations have been shown to have improved outcomes in HV centres, but this may not be uniform across all surgeries and no benefits have been associated to volume in percutaneous nephrolithotomy or appendicectomy [41–46]. This meta-analysis provides a contemporary review of the effects of centralisation in nephrectomy outcomes. It has revealed significant inverse associations between hospital case volumes for short-term mortality and complications for radical nephrectomies and nephrectomies with venous thrombectomies.

Considered individually, all but three studies in our review reported lack of associations between hospital volume and nephrectomy mortality [25,33,35]. However, such associations in favour of HV hospitals were apparent when considering the totality of the evidence particularly in radical nephrectomies and venous thrombectomies. This finding is consistent with the only other meta-analysis on nephrectomy volume-outcome relationship published in 2009 but includes four-fold greater number of studies [19]. Our meta-analysis demonstrates that the mortality benefit seen in radical nephrectomy may be relatively small requiring centralisation of 234 patients in order to avoid one death. However, the NNC decreased considerably to 166 in our sensitivity analyses. Coupled with the much lower NNC of 38 for radical nephrectomy complications, there is moderate evidence to support its centralisation.

Our analyses would be consistent with the “practice makes perfect” hypothesis for volume-outcome relationship [47]. Particularly, the reduction in mortality for nephrectomy with

1  
2  
3 venous thrombectomy, a technically challenging operation, was observed to be more  
4  
5 pronounced than that in radical nephrectomy with potentially one avoidable death for every  
6  
7 25 cases centralised to HV hospitals. However, similar trend was not seen in partial  
8  
9 nephrectomy, also considered technically complex. Partial nephrectomy has been  
10  
11 demonstrated to be a safe procedure with comparable short-term mortality and morbidity  
12  
13 profile to radical nephrectomy and at such the relatively small number of partial  
14  
15 nephrectomy patients in our meta-analysis might not have been sufficient to reveal the true  
16  
17 presence of a volume-outcome relationship, as evident in our wide confidence interval [48].  
18  
19 This may also explain the lack of significant association between partial nephrectomy  
20  
21 complications and hospital volumes. With its low mortality and morbidity rates, other  
22  
23 outcome measures such as ischaemic time and negative surgical margins, are likely to be  
24  
25 more appropriate quality markers in volume-outcome analysis. These have so far been  
26  
27 poorly evaluated in current studies.  
28  
29  
30  
31  
32  
33  
34  
35

36 Despite the strict inclusion criteria in our studies, we observed considerable heterogeneity,  
37  
38 especially in the meta-analyses of nephrectomy complications. One explanation for this is  
39  
40 the lack of standardised reporting of complications by individual studies. Harder endpoints  
41  
42 as previously discussed could have overcome this. Other more objective outcomes including  
43  
44 transfusion rate and length of stay were reported by four [26,27,31,38] and eight studies  
45  
46 [26–28,30,34,37,38,49] in our systematic review respectively, but they were not in adequate  
47  
48 numbers to be stratified by nephrectomy types or in sufficiently detailed data to perform  
49  
50 meta-analyses. In addition, variations in the threshold values for HV hospitals likely  
51  
52 contributed to the heterogeneity, although this was not evident in the meta-regression.  
53  
54  
55  
56  
57  
58  
59  
60

1  
2  
3 Results from the multiple sensitivity analyses to adjust for these differences have remained  
4  
5 robust and our study would therefore appear to be informative and relevant.  
6  
7

8  
9  
10 While there has been an expansion in the studies on nephrectomy volume-outcome  
11  
12 relationship, many questions continue to be unanswered. The proportion of nephrectomy  
13  
14 performed under laparoscopy or robotic assistance is growing [50,51]. There is however a  
15  
16 paucity of evidence specifically investigating this in the volume-outcome context with only  
17  
18 one study examining the differences in perioperative measures in robotic partial  
19  
20 nephrectomy [38]. Three other studies have adjusted surgical techniques in multivariable  
21  
22 regressions, but these did not directly demonstrate the effect of laparoscopic volumes on  
23  
24 surgical outcomes [14,26,29]. Due to the small study number and data quality, it was not  
25  
26 possible in this meta-analysis to further sub-stratify each nephrectomy type into open and  
27  
28 minimally invasive and our results should be interpreted taking this limitation into account.  
29  
30  
31  
32  
33  
34  
35

36 Tumour characteristics including TNM stage and grades are well established to significantly  
37  
38 affect and predict nephrectomy mortality, but only two studies have so far adjusted for this  
39  
40 in their analyses [14,25]. Surgeon case volume and degree of specialisation also play  
41  
42 significant roles in determining operative outcome, and can be more important than hospital  
43  
44 case volume alone [43,52–54]. While not the focus of this study, no significant association  
45  
46 was found between surgeon volume and complications in radical nephrectomy [14], but 31%  
47  
48 and 16% reduction in mortality and complications respectively was observed in partial  
49  
50 nephrectomy in HV surgeons [39]. HV surgeons performing nephrectomy with venous  
51  
52 thrombectomy were also reported to have reduced risk of mortality [15], but this was not  
53  
54 observed in a subsequent study [40]. It would be of high interest to understand the  
55  
56  
57  
58  
59  
60

1  
2  
3 interactions between surgeon volume, surgical approach and oncological factors in the  
4  
5 volume-outcome relationship and may provide additional insights to selecting patients that  
6  
7 will benefit the most from nephrectomy centralisation, such as those with advanced disease.  
8  
9 Similarly, no study has examined the long-term benefits of centralising nephrectomy when  
10  
11 high volume centres have been demonstrated to increase oncological survival in other  
12  
13 cancer surgeries [55,56]. Results of this may further influence the recommendations for  
14  
15 nephrectomy centralisation and this is currently being explored in our ongoing work. Other  
16  
17 outcomes including long-term risks of chronic kidney disease and cardiovascular morbidities  
18  
19 and patient reported outcome measures may also provide more relevant and holistic  
20  
21 measurements of the potential efficacy of nephrectomy centralisation.  
22  
23  
24  
25  
26  
27  
28

29 Our secondary analyses would suggest that a minimum volume threshold for nephrectomy  
30  
31 likely exist, and beyond that, risks of adverse outcomes may continue to decrease with  
32  
33 further increase in volume. An important limitation of this however is that this minimum  
34  
35 threshold cannot be objectively determined from the current evidence. Volume is also likely  
36  
37 to be a proxy marker of other specific care processes that may produce improved outcome,  
38  
39 such as access to nurse specialists and clinical trials [57]. Increasing volume alone in itself  
40  
41 may therefore not reduce adverse results. Future research should concentrate on identifying  
42  
43 the qualitative differences between providers in order for the contributing good practices to  
44  
45 be adopted by lesser performing centres.  
46  
47  
48  
49  
50  
51  
52  
53  
54  
55  
56  
57  
58  
59  
60



## CONCLUSIONS

Current evidence of the association between hospitals volumes and nephrectomy outcomes is of low quality with considerable heterogeneity amongst studies. Our meta-analyses have demonstrated significant reduction in mortality and complications for patients undergoing radical nephrectomy and nephrectomy with venous thrombectomy in HV hospitals. Evidence of this in partial nephrectomy is not yet clear but warrants further investigations.

For peer review only

**ACKNOWLEDGMENTS**

We would like to acknowledge Annie Herbert for providing valuable critiques of the methodologies.

For peer review only

**CONTRIBUTORS**

RCJH, VJG and JNA contributed to the study conception and design. RCJH, JM and JNA contributed to data acquisition and risk of bias assessment. RCJH, TS, GL, VJG, JNA contributed to statistical analysis, data interpretation and critical manuscript revision. RCJH contributed to drafting the manuscript. RCJH contributed to obtaining funding. GL, VJG and JNA contributed to supervision of the study.

**FUNDING STATEMENT**

This work was supported by Addenbrooke's Charitable Trust, the Royal College of Surgeons of England and the Urology Foundation.

**COMPETING INTEREST STATEMENT**

None declared.

**DATA SHARING STATEMENT**

No additional data are available.

## REFERENCES

- 1 National Institute for Clinical Excellence. Guidance on cancer services: Improving outcomes in urological cancers. London: 2002.
- 2 Cooperberg MR, Modak S, Konety BR. Trends in regionalization of inpatient care for urological malignancies, 1988 to 2002. *J Urol* 2007;**178**:2103–8.
- 3 Boudourakis LD, Wang TS, Roman SA, *et al*. Evolution of the surgeon-volume, patient-outcome relationship. *Ann Surg* 2009;**250**:159–65.
- 4 Birkmeyer JD, Lucas FL, Wennberg DE. Potential benefits of regionalizing major surgery in Medicare patients. *Eff Clin Pract* 1999;**2**:277–83.
- 5 Nguyen NT, Paya M, Stevens CM, *et al*. The relationship between hospital volume and outcome in bariatric surgery at academic medical centers. *Ann Surg* 2004;**240**:586–93.
- 6 Pieper D, Mathes T, Neugebauer E, *et al*. State of evidence on the relationship between high-volume hospitals and outcomes in surgery: a systematic review of systematic reviews. *J Am Coll Surg* 2013;**216**:1015–25.
- 7 Trinh QD, Bjartell A, Freedland SJ, *et al*. A systematic review of the volume-outcome relationship for radical prostatectomy. *Eur Urol* 2013;**64**:786–98.
- 8 Hounscome LS, Verne J, McGrath JS, *et al*. Trends in operative caseload and mortality rates after radical cystectomy for bladder cancer in England for 1998–2010. *Eur Urol* 2015;**67**:1056–62.
- 9 Tan H-J, Norton EC, Ye Z, *et al*. Long-term Survival Following Partial vs Radical Nephrectomy Among Older Patients With Early-Stage Kidney Cancer. *JAMA* 2012;**307**:1629–35.

- 1  
2  
3 10 Kim SP, Thompson RH, Boorjian S a, *et al.* Comparative effectiveness for survival and  
4  
5 renal function of partial and radical nephrectomy for localized renal tumors: a  
6  
7 systematic review and meta-analysis. *J Urol* 2012;**188**:51–7.  
8  
9  
10 11 Ferlay J, Soerjomataram I, Ervik M, *et al.* GLOBOCAN 2012 v1.0, Cancer Incidence and  
12  
13 Mortality Worldwide: IARC CancerBase No. 11. 2013.<http://globocan.iarc.fr> (accessed  
14  
15 5 Jan 2016).  
16  
17  
18 12 Znaor A, Lortet-Tieulent J, Laversanne M, *et al.* International variations and trends in  
19  
20 renal cell carcinoma incidence and mortality. *Eur Urol* 2015;**67**:519–30.  
21  
22  
23 13 Moher D, Liberati A, Tetzlaff J, *et al.* Preferred reporting items for systematic reviews  
24  
25 and meta-analyses: the PRISMA statement. *PLoS Med* 2009;**6**:e1000097.  
26  
27  
28 14 Yasunaga H, Yanaihara H, Fuji K, *et al.* Influence of hospital and surgeon volumes on  
29  
30 operative time, blood loss and perioperative complications in radical nephrectomy. *Int*  
31  
32 *J Urol* 2008;**15**:688–93.  
33  
34  
35 15 Yap SA, Horovitz D, Alibhai SMH, *et al.* Predictors of early mortality after radical  
36  
37 nephrectomy with renal vein or inferior vena cava thrombectomy - a population-  
38  
39 based study. *BJU Int* 2012;**110**:1283–8.  
40  
41  
42  
43 16 Awopetu a. I, Moxey P, Hinchliffe RJ, *et al.* Systematic review and meta-analysis of  
44  
45 the relationship between hospital volume and outcome for lower limb arterial surgery.  
46  
47 *Br J Surg* 2010;**97**:797–803.  
48  
49  
50 17 Holt PJE, Poloniecki JD, Loftus IM, *et al.* Meta-Analysis and Systematic Review of the  
51  
52 Relationship between Hospital Volume and Outcome Following Carotid  
53  
54 Endarterectomy. *Eur J Vasc Endovasc Surg* 2007;**33**:645–51.  
55  
56  
57  
58 18 Halm EA, Lee C, Chassin MR. Is volume related to outcome in health care? a  
59  
60

- 1  
2  
3 systematic review and methodologic critique of the literature. *Ann Intern Med*  
4  
5 2002;**137**:511–20.  
6  
7  
8 19 Mayer EK, Purkayastha S, Athanasiou T, *et al.* Assessing the quality of the volume-  
9  
10 outcome relationship in uro-oncology. *BJU Int* 2009;**103**:341–9.  
11  
12  
13 20 StataCorp. Stata Statistical Software: Release 14. 2015.  
14  
15  
16 21 Higgins JPT, Thompson SG. Quantifying heterogeneity in a meta-analysis. *Stat Med*  
17  
18 2002;**21**:1539–58.  
19  
20  
21 22 Higgins JPT, Thompson SG, Deeks JJ, *et al.* Measuring inconsistency in meta-analyses.  
22  
23 *BMJ* 2003;**327**:557–60.  
24  
25  
26 23 Harbord RM, Egger M, Sterne JAC. A modified test for small-study effects in meta-  
27  
28 analyses of controlled trials with binary endpoints. *Stat Med* 2006;**25**:3443–57.  
29  
30  
31 24 Duval S, Tweedie R. A Nonparametric ‘Trim and Fill’ Method of Accounting for  
32  
33 Publication Bias in Meta-Analysis. *J Am Stat Soc* 2000;**95**:89–98.  
34  
35  
36 25 Hjelle KM, Johannesen TB, Beisland C. Postoperative 30-day Mortality Rates for  
37  
38 Kidney Cancer Are Dependent on Hospital Surgical Volume: Results from a Norwegian  
39  
40 Population-based Study. *Eur Urol Focus*;:1–8.  
41  
42  
43 26 Becker A, Bianchi M, Hansen J, *et al.* Benefit in regionalization of care for patients  
44  
45 treated with nephrectomy: a Nationwide Inpatient Sample. *World J Urol*  
46  
47 2014;**32**:1511–21.  
48  
49  
50 27 Sun M, Bianchi M, Trinh Q-D, *et al.* Hospital volume is a determinant of postoperative  
51  
52 complications, blood transfusion and length of stay after radical or partial  
53  
54 nephrectomy. *J Urol* 2012;**187**:405–10.  
55  
56  
57  
58  
59  
60

- 1  
2  
3 28 Hanchanale VS, Javlé P. Impact of hospital provider volume on outcome for radical  
4 urological cancer surgery in England. *Urol Int* 2010;**85**:11–5.  
5  
6  
7  
8 29 Yasunaga H, Yanaihara H, Fuji K, *et al*. Impact of hospital volume on postoperative  
9 complications and in-hospital mortality after renal surgery: data from the Japanese  
10 Diagnosis Procedure Combination database. *Urology* 2010;**76**:548–52.  
11  
12  
13 30 Mitchell RE, Lee BT, Cookson MS, *et al*. Radical nephrectomy surgical outcomes in the  
14 University HealthSystem Consortium data base: impact of hospital case volume,  
15 hospital size, and geographic location on 40,000 patients. *Cancer* 2009;**115**:2447–52.  
16  
17  
18 31 Davenport K, Timoney AG, X KF, *et al*. A 3-year review of The British Association of  
19 Urological Surgeons Section of Endourology Laparoscopic Nephrectomy Audit. *BJU Int*  
20 2006;**97**:333–7.  
21  
22  
23 32 Keoghane SR, Keeley FX, Timoney AG, *et al*. The British Association of Urological  
24 Surgeons section of endourology audit of laparoscopic nephrectomy. *BJU Int*  
25 2004;**94**:577–81.  
26  
27  
28 33 Taub DA, Miller DC, Cowan JA, *et al*. Impact of surgical volume on mortality and length  
29 of stay after nephrectomy. *Urology* 2004;**63**:862–7.  
30  
31  
32 34 Goodney PP, Stukel TA, Lucas FL, *et al*. Hospital volume, length of stay, and  
33 readmission rates in high-risk surgery. *Ann Surg* 2003;**238**:161–7.  
34  
35  
36 35 Birkmeyer JD, Siewers AE, Finlayson EVA, *et al*. Hospital volume and surgical mortality  
37 in the United States. *N Engl J Med* 2002;**346**:1128–37.  
38  
39  
40 36 Porpiglia F, Mari A, Bertolo R, *et al*. Partial Nephrectomy in Clinical T1b Renal Tumors:  
41 Multicenter Comparative Study of Open, Laparoscopic and Robot-assisted Approach  
42 (the RECORd Project). *Urology* 2016;**89**:45–51.  
43  
44  
45  
46  
47  
48  
49  
50  
51  
52  
53  
54  
55  
56  
57  
58  
59  
60

- 1  
2  
3 37 Couapel J-P, Bensalah K, Bernhard J-C, *et al.* Is there a volume–outcome relationship  
4 for partial nephrectomy? *World J Urol* 2014;**32**:1323–9.  
5  
6  
7  
8 38 Monn MF, Bahler CD, Flack CK, *et al.* The impact of hospital volume on postoperative  
9 complications following robot-assisted partial nephrectomy. *J Endourol*  
10 2014;**28**:1231–6.  
11  
12  
13 39 Abouassaly R, Finelli A, Tomlinson GA, *et al.* Volume-outcome relationships in the  
14 treatment of renal tumors. *J Urol* 2012;**187**:1984–8.  
15  
16  
17  
18 40 Toren P, Abouassaly R, Timilshina N, *et al.* Results of a national population-based  
19 study of outcomes of surgery for renal tumors associated with inferior vena cava  
20 thrombus. *Urology* 2013;**82**:572–7.  
21  
22  
23  
24 41 Withington JM, Charman SC, Armitage JN, *et al.* Hospital Volume Does Not Influence  
25 the Safety of Percutaneous Nephrolithotomy in England: A Population-Based Cohort  
26 Study. *J Endourol* 2015;**29**:899–906.  
27  
28  
29  
30 42 Lariviere CA, McAteer JP, Huaco JA, *et al.* Outcomes in pediatric surgery by hospital  
31 volume: A population-based comparison. *Pediatr Surg Int* 2013;**29**:561–70.  
32  
33  
34  
35 43 Eskander A, Merdad M, Irish JC, *et al.* Volume-outcome associations in head and neck  
36 cancer treatment: a systematic review and meta-analysis. *Head Neck* 2014;**36**:1820–  
37 34.  
38  
39  
40  
41 44 Strom JB, Wimmer NJ, Wasfy JH, *et al.* Association between operator procedure  
42 volume and patient outcomes in percutaneous coronary intervention: a systematic  
43 review and meta-analysis. *Circ Cardiovasc Qual Outcomes* 2014;**7**:560–6.  
44  
45  
46  
47  
48 45 Hata T, Motoi F, Ishida M, *et al.* Effect of hospital volume on surgical outcomes after  
49 pancreaticoduodenectomy. *Ann Surg* 2016;**263**:664–72.  
50  
51  
52  
53  
54  
55  
56  
57  
58  
59  
60



- 1  
2  
3 46 Boogaarts HD, van Amerongen MJ, de Vries J, *et al.* Caseload as a factor for outcome  
4  
5 in aneurysmal subarachnoid hemorrhage: a systematic review and meta-analysis. *J*  
6  
7 *Neurosurg* 2014;**120**:605–11.  
8  
9  
10 47 Luft HS, Hunt SS, Maerki SC. The volume-outcome relationship: practice-makes-  
11  
12 perfect or selective-referral patterns? *Health Serv Res* 1987;**22**:157–82.  
13  
14  
15 48 Corman JM, Penson DF, Hur K, *et al.* Comparison of complications after radical and  
16  
17 partial nephrectomy: Results from the National Veterans Administration Surgical  
18  
19 Quality Improvement Program. *BJU Int* 2000;**86**:782–9.  
20  
21  
22 49 Hollenbeck BK, Taub D a, Miller DC, *et al.* Use of nephrectomy at select medical  
23  
24 centers--a case of follow the crowd? *J Urol* 2006;**175**:670–4.  
25  
26  
27  
28 50 Nuttall M, Cathcart P, van der Meulen J, *et al.* A description of radical nephrectomy  
29  
30 practice and outcomes in England: 1995-2002. *BJU Int* 2005;**96**:58–61.  
31  
32  
33 51 Fedeli U, Novara G, Alba N, *et al.* Trends from 1999 to 2007 in the surgical treatments  
34  
35 of kidney cancer in Europe: Data from the Veneto Region, Italy. *BJU Int*  
36  
37 2010;**105**:1255–9.  
38  
39  
40 52 Birkmeyer J, Stukel T, Siewers A, *et al.* Surgeon volume and operative mortality in the  
41  
42 United States. *N Engl J Med* 2003;**349**:2117–27.  
43  
44  
45 53 Brusselaers N, Mattsson F, Lagergren J. Hospital and surgeon volume in relation to  
46  
47 long-term survival after oesophagectomy: systematic review and meta-analysis. *Gut*  
48  
49 2014;**63**:1393–400.  
50  
51  
52 54 Sahni NR, Dalton M, Cutler DM, *et al.* Surgeon specialization and operative mortality  
53  
54 in United States: retrospective analysis. *BMJ* 2016;**354**:i3571.  
55  
56  
57  
58  
59  
60

- 1  
2  
3 55 Birkmeyer JD, Sun Y, Wong SL, *et al.* Hospital volume and late survival after cancer  
4 surgery. *Ann Surg* 2007;**245**:777–83.  
5  
6  
7  
8 56 Gooiker GA, Van Gijn W, Wouters MWJM, *et al.* Systematic review and meta-analysis  
9 of the volume-outcome relationship in pancreatic surgery. *Br J Surg* 2011;**98**:485–94.  
10  
11  
12  
13 57 Berger DH, Ko CY, Spain DA, *et al.* Society of University Surgeons position statement  
14 on the volume-outcome relationship for surgical procedures. *Surgery* 2003;**134**:34–40.  
15  
16  
17  
18  
19  
20  
21  
22  
23  
24  
25  
26  
27  
28  
29  
30  
31  
32  
33  
34  
35  
36  
37  
38  
39  
40  
41  
42  
43  
44  
45  
46  
47  
48  
49  
50  
51  
52  
53  
54  
55  
56  
57  
58  
59  
60

1  
2  
3 **SUPPORTING INFORMATION CAPTIONS**  
4

5 **S1 Appendix.** Preferred Reporting Items for Systematic Reviews and Meta-Analyses  
6

7  
8 (PRISMA) checklist.  
9

10  
11  
12  
13 **S2 Appendix.** Literature search algorithm used in Medline, Embase and the Cochrane Library.  
14  
15

16  
17  
18  
19 **S3 Appendix.** Results of meta-regression investigating the potential explanatory variables for  
20  
21 the heterogeneity in the meta-analyses for mortality in **A.** radical nephrectomy and **B.** partial  
22  
23 nephrectomy.  
24  
25

26  
27  
28  
29 **S4 Appendix.** List of excluded studies after full-text review and justifications.  
30  
31  
32  
33  
34  
35  
36  
37  
38  
39  
40  
41  
42  
43  
44  
45  
46  
47  
48  
49  
50  
51  
52  
53  
54  
55  
56  
57  
58  
59  
60

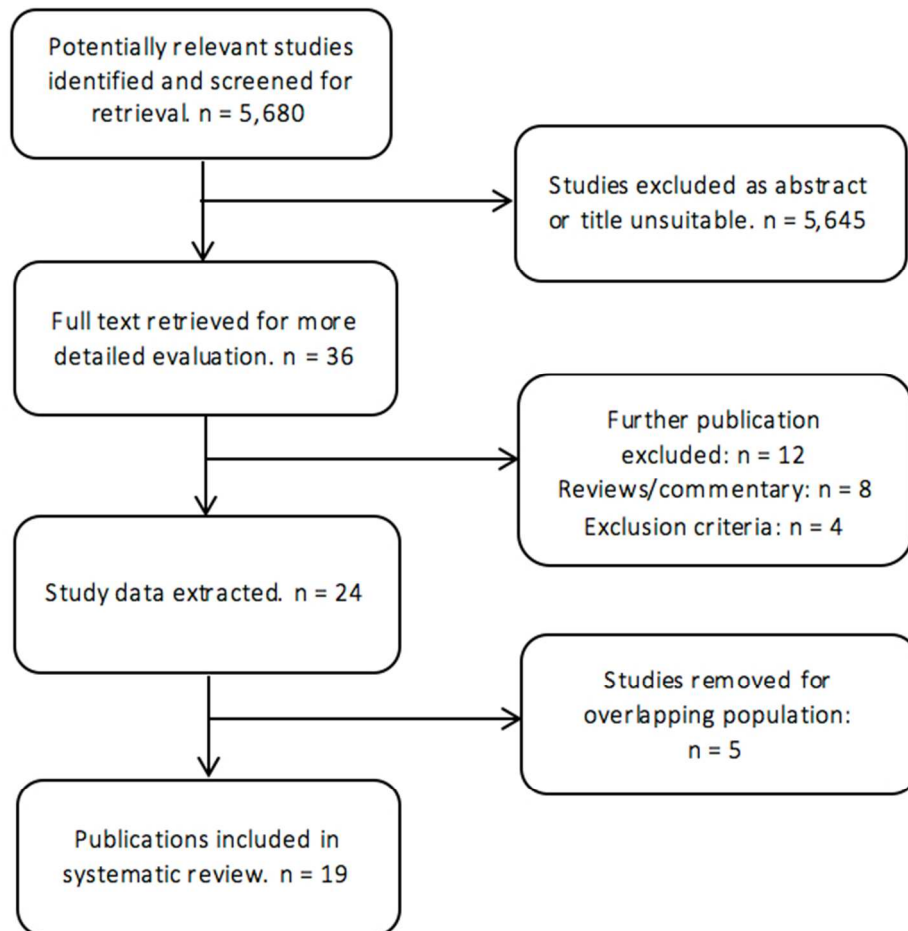

Fig 1. Flow chart of the article selection process.

58x60mm (300 x 300 DPI)

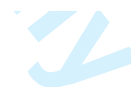

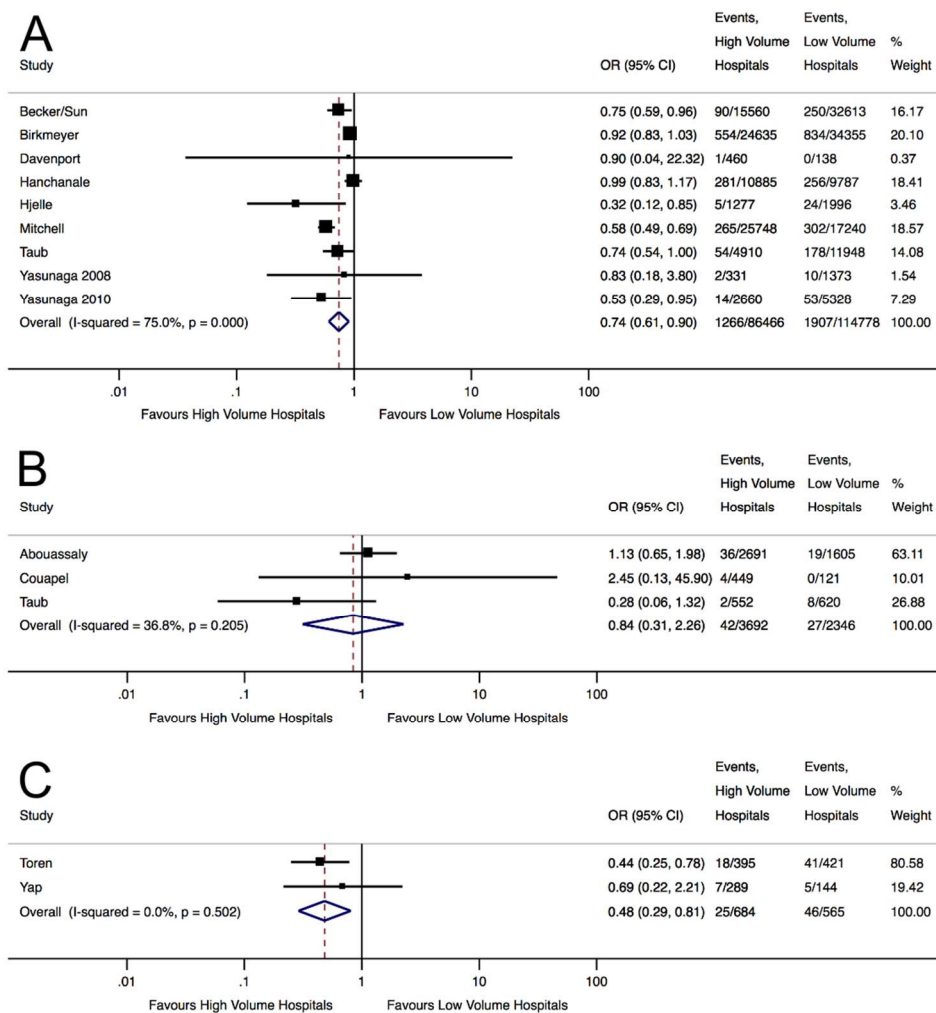

Fig 2. Forest plots displaying the pooled estimates of nephrectomy mortality in HV and LV hospitals for A. radical nephrectomy B. partial nephrectomy C. nephrectomy with venous thrombectomy.

100x105mm (300 x 300 DPI)

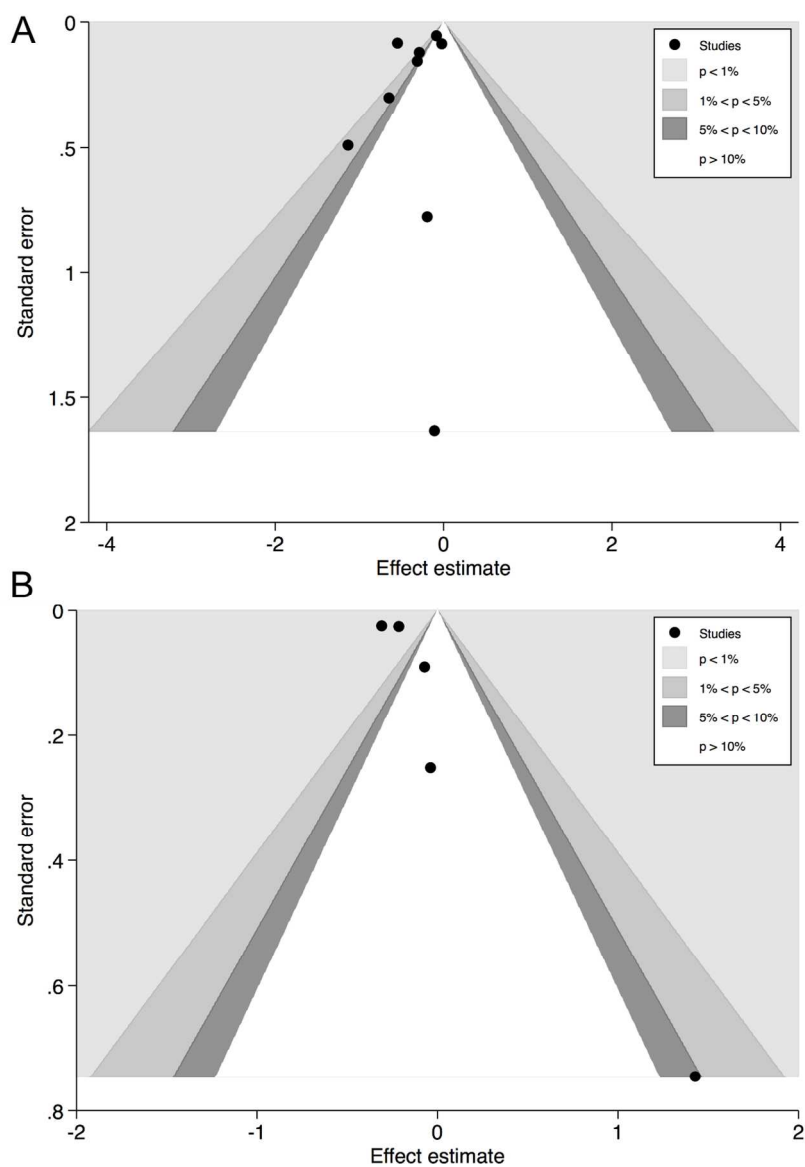

Fig 3. Contour-enhanced funnel plot of studies analysing hospital volume-outcome relationship in radical nephrectomy for A. mortality B. complications. Harbord’s modified test for funnel plot asymmetry was not statistically significant for both.

111x160mm (300 x 300 DPI)

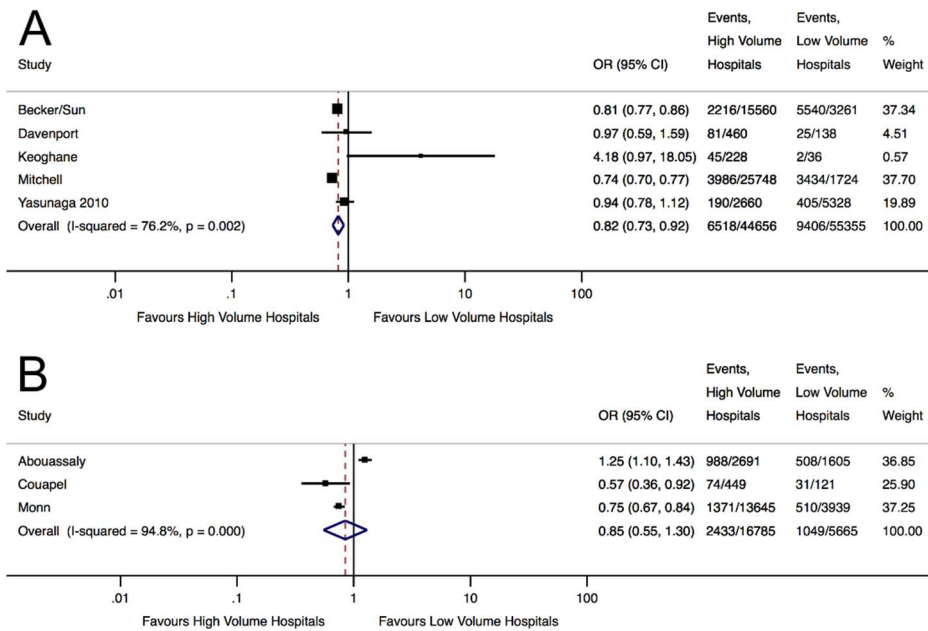

Fig 4. Forest plots displaying the pooled estimates of nephrectomy complications in HV and LV hospitals for A. radical nephrectomy B. partial nephrectomy.

101x66mm (300 x 300 DPI)

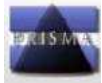

# PRISMA 2009 Checklist

1  
2  
3  
4  
5  
6  
7  
8  
9  
10  
11  
12  
13  
14  
15  
16  
17  
18  
19  
20  
21  
22  
23  
24  
25  
26  
27  
28  
29  
30  
31  
32  
33  
34  
35  
36  
37  
38  
39  
40  
41  
42  
43  
44  
45  
46  
47  
48  
49

| Section/topic                      | #  | Checklist item                                                                                                                                                                                                                                                                                              | Reported on page # |
|------------------------------------|----|-------------------------------------------------------------------------------------------------------------------------------------------------------------------------------------------------------------------------------------------------------------------------------------------------------------|--------------------|
| <b>TITLE</b>                       |    |                                                                                                                                                                                                                                                                                                             |                    |
| Title                              | 1  | Identify the report as a systematic review, meta-analysis, or both.                                                                                                                                                                                                                                         | 1                  |
| <b>ABSTRACT</b>                    |    |                                                                                                                                                                                                                                                                                                             |                    |
| Structured summary                 | 2  | Provide a structured summary including, as applicable: background; objectives; data sources; study eligibility criteria, participants, and interventions; study appraisal and synthesis methods; results; limitations; conclusions and implications of key findings; systematic review registration number. | 2-3                |
| <b>INTRODUCTION</b>                |    |                                                                                                                                                                                                                                                                                                             |                    |
| Rationale                          | 3  | Describe the rationale for the review in the context of what is already known.                                                                                                                                                                                                                              | 5                  |
| Objectives                         | 4  | Provide an explicit statement of questions being addressed with reference to participants, interventions, comparisons, outcomes, and study design (PICOS).                                                                                                                                                  | 5                  |
| <b>METHODS</b>                     |    |                                                                                                                                                                                                                                                                                                             |                    |
| Protocol and registration          | 5  | Indicate if a review protocol exists, if and where it can be accessed (e.g., Web address), and, if available, provide registration information including registration number.                                                                                                                               | N/A                |
| Eligibility criteria               | 6  | Specify study characteristics (e.g., PICOS, length of follow-up) and report characteristics (e.g., years considered, language, publication status) used as criteria for eligibility, giving rationale.                                                                                                      | 7                  |
| Information sources                | 7  | Describe all information sources (e.g., databases with dates of coverage, contact with study authors to identify additional studies) in the search and date last searched.                                                                                                                                  | 7                  |
| Search                             | 8  | Present full electronic search strategy for at least one database, including any limits used, such that it could be repeated.                                                                                                                                                                               | 7                  |
| Study selection                    | 9  | State the process for selecting studies (i.e., screening, eligibility, included in systematic review, and, if applicable, included in the meta-analysis).                                                                                                                                                   | 7-8                |
| Data collection process            | 10 | Describe method of data extraction from reports (e.g., piloted forms, independently, in duplicate) and any processes for obtaining and confirming data from investigators.                                                                                                                                  | 7-8                |
| Data items                         | 11 | List and define all variables for which data were sought (e.g., PICOS, funding sources) and any assumptions and simplifications made.                                                                                                                                                                       | 7-8                |
| Risk of bias in individual studies | 12 | Describe methods used for assessing risk of bias of individual studies (including specification of whether this was done at the study or outcome level), and how this information is to be used in any data synthesis.                                                                                      | 8                  |
| Summary measures                   | 13 | State the principal summary measures (e.g., risk ratio, difference in means).                                                                                                                                                                                                                               | 8-9                |
| Synthesis of results               | 14 | Describe the methods of handling data and combining results of studies, if done, including measures of consistency (e.g., $I^2$ for each meta-analysis).                                                                                                                                                    | 8-9                |



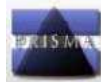

# PRISMA 2009 Checklist

Page 1 of 2

| Section/topic                 | #  | Checklist item                                                                                                                                                                                           | Reported on page # |
|-------------------------------|----|----------------------------------------------------------------------------------------------------------------------------------------------------------------------------------------------------------|--------------------|
| Risk of bias across studies   | 15 | Specify any assessment of risk of bias that may affect the cumulative evidence (e.g., publication bias, selective reporting within studies).                                                             | 9-10               |
| Additional analyses           | 16 | Describe methods of additional analyses (e.g., sensitivity or subgroup analyses, meta-regression), if done, indicating which were pre-specified.                                                         | 9-10               |
| <b>RESULTS</b>                |    |                                                                                                                                                                                                          |                    |
| Study selection               | 17 | Give numbers of studies screened, assessed for eligibility, and included in the review, with reasons for exclusions at each stage, ideally with a flow diagram.                                          | 11                 |
| Study characteristics         | 18 | For each study, present characteristics for which data were extracted (e.g., study size, PICOS, follow-up period) and provide the citations.                                                             | 11-13              |
| Risk of bias within studies   | 19 | Present data on risk of bias of each study and, if available, any outcome level assessment (see item 12).                                                                                                | 11-13              |
| Results of individual studies | 20 | For all outcomes considered (benefits or harms), present, for each study: (a) simple summary data for each intervention group (b) effect estimates and confidence intervals, ideally with a forest plot. | 14-17              |
| Synthesis of results          | 21 | Present results of each meta-analysis done, including confidence intervals and measures of consistency.                                                                                                  | 14-17              |
| Risk of bias across studies   | 22 | Present results of any assessment of risk of bias across studies (see Item 15).                                                                                                                          | 14-17              |
| Additional analysis           | 23 | Give results of additional analyses, if done (e.g., sensitivity or subgroup analyses, meta-regression [see Item 16]).                                                                                    | 14-18              |
| <b>DISCUSSION</b>             |    |                                                                                                                                                                                                          |                    |
| Summary of evidence           | 24 | Summarize the main findings including the strength of evidence for each main outcome; consider their relevance to key groups (e.g., healthcare providers, users, and policy makers).                     | 19                 |
| Limitations                   | 25 | Discuss limitations at study and outcome level (e.g., risk of bias), and at review-level (e.g., incomplete retrieval of identified research, reporting bias).                                            | 20-22              |
| Conclusions                   | 26 | Provide a general interpretation of the results in the context of other evidence, and implications for future research.                                                                                  | 20-23              |
| <b>FUNDING</b>                |    |                                                                                                                                                                                                          |                    |
| Funding                       | 27 | Describe sources of funding for the systematic review and other support (e.g., supply of data); role of funders for the systematic review.                                                               | 1                  |

From: Moher D, Liberati A, Tetzlaff J, Altman DG, The PRISMA Group (2009). Preferred Reporting Items for Systematic Reviews and Meta-Analyses: The PRISMA Statement. PLoS Med 6(7): e1000097. doi:10.1371/journal.pmed1000097

For more information, visit: [www.prisma-statement.org](http://www.prisma-statement.org).

Page 2 of 2

For peer review only - <http://bmjopen.bmj.com/site/about/guidelines.xhtml>

**S2 Appendix.** Literature search algorithm for Medline, Embase and the Cochrane Library.

**Medline**

**Nephrectomy Terms:**

1. exp Nephrectomy/
2. nephrectom\*.mp.
3. (kidney\* adj5 (excision\* or remov\*)).mp.
4. 1 or 2 or 3

**Surgeon or Hospital Volume Terms**

5. ((physician\* or urol\* or surg\* or operat\* or hospital\* or procedure\*) adj5 (volume\* or workload\* or caseload\* or performance\* or number\*)).mp.
6. exp Hospitals/
7. exp Surgeons/
8. (volume\* or workload\* or caseload\* or performance\*).mp.
9. exp Workload/
10. 6 and 8
11. 7 and 8
12. 6 and 9
13. 7 and 9
14. exp Centralized Hospital Services/
15. centrali\*ation.mp.
16. 5 or 8 or 9 or 10 or 11 or 12 or 13 or 14 or 15

**Outcome Terms**

17. exp "Outcome Assessment (Health Care)"/
18. exp Patient Outcome Assessment/
19. exp "Outcome and Process Assessment (Health Care)"/
20. outcome.mp.
21. exp Treatment Outcome/
22. exp Mortality/
23. mortalit\*.mp.
24. exp Morbidity/
25. morbidit\*.mp.
26. exp "Length of Stay"/
27. length of stay.mp.
28. ((duration or length or period) adj5 (stay or hospital\*)).mp.
29. exp Survival/
30. survival.mp.
31. exp Patient Readmission/
32. readmission.mp.
33. exp Postoperative Complications/
34. complication\*.mp.
35. 17 or 18 or 19 or 20 or 21 or 22 or 23 or 24 or 25 or 26 or 27 or 28 or 29 or 30 or 31 or 32 or 33 or 34
36. 4 and 16 and 35

**Embase**

**Nephrectomy Terms:**

1. exp Nephrectomy/
2. exp Partial nephrectomy/
3. exp "Patient history of nephrectomy"/
4. nephrectom\*.mp.
5. (kidney\* adj5 (excision\* or remov\*)).mp.
6. 1 or 2 or 3 or 4 or 5

**Surgeon or Hospital Volume Terms**

7. ((physician\* or urol\* or surg\* or operat\* or hospital\* or procedure\*) adj5 (volume\* or workload\* or caseload\* or performance\* or number\*)).mp.
8. exp Hospital/

9. exp Surgeon/
10. (volume\* or workload\* or caseload\* or performance\*).mp.
11. exp Workload/
12. 8 and 10
13. 9 and 10
14. 8 and 11
15. 9 and 11
16. exp Centralization/
17. centrali\*ation.mp.
18. 7 or 10 or 11 or 12 or 13 or 14 or 15 or 16 or 17

#### **Outcome Terms**

19. exp Outcome Assessment/
20. exp Treatment Outcome/
21. outcome.mp.
22. exp Mortality/
23. mortalit\*.mp.
24. exp Morbidity/
25. morbidit\*.mp.
26. exp "Length of Stay"/
27. length of stay.mp.
28. ((duration or length or period) adj5 (stay or hospital\*)).mp.
29. exp Survival/
30. survival.mp.
31. exp Hospital readmission/
32. readmission.mp.
33. exp Postoperative Complications/
34. complication\*.mp.
35. 19 or 20 or 21 or 22 or 23 or 24 or 25 or 26 or 27 or 28 or 29 or 30 or 31 or 32 or 33 or 34
36. 6 and 18 and 35

#### **Cochrane Library**

##### **Nephrectomy Terms:**

1. exp Nephrectomy/
2. nephrectom\*
3. kidney\* near (excision\* or remov\*)
4. 1 or 2 or 3

##### **Surgeon or Hospital Volume Terms**

5. (physician\* or urol\* or surg\* or operat\* or hospital\* or procedure\*) near (volume\* or workload\* or caseload\* or performance\* or number\*)
6. exp Hospitals/
7. exp Surgeons/
8. volume\* or workload\* or caseload\* or performance\*
9. exp Workload/
10. 6 and 8
11. 7 and 8
12. 6 and 9
13. 7 and 9
14. exp Centralized Hospital Services/
15. centrali\*ation
16. 5 or 8 or 9 or 10 or 11 or 12 or 13 or 14 or 15

##### **Outcome Terms**

17. exp "Outcome Assessment (Health Care)"/
18. exp Patient Outcome Assessment/
19. exp "Outcome and Process Assessment (Health Care)"/
20. outcome
21. exp Treatment Outcome/
22. exp Mortality/

- 1
- 2
- 3 23. mortalit\*
- 4 24. exp Morbidity/
- 5 25. morbidit\*
- 6 26. exp "Length of Stay"/
- 7 27. length of stay
- 8 28. (duration or length or period) near (stay or hospital\*)
- 9 29. exp Survival/
- 10 30. survival
- 11 31. exp Patient Readmission/
- 12 32. readmission
- 13 33. exp Postoperative Complications/
- 14 34. complication\*
- 15 35. 17 or 18 or 19 or 20 or 21 or 22 or 23 or 24 or 25 or 26 or 27 or 28 or 29 or 30 or 31 or 32 or 33 or 34
- 16 36. 4 and 16 and 35
- 17
- 18
- 19
- 20
- 21
- 22
- 23
- 24
- 25
- 26
- 27
- 28
- 29
- 30
- 31
- 32
- 33
- 34
- 35
- 36
- 37
- 38
- 39
- 40
- 41
- 42
- 43
- 44
- 45
- 46
- 47
- 48
- 49
- 50
- 51
- 52
- 53
- 54
- 55
- 56
- 57
- 58
- 59
- 60

**S3 Appendix.** Results of meta-regression investigating the heterogeneity in the meta-analyses for mortality and its potential explanatory variables in **A.** radical nephrectomy and **B.** partial nephrectomy.

**A.**

| Explanatory Variable       | Regression Coefficient | 95% Confidence Interval | p Value |
|----------------------------|------------------------|-------------------------|---------|
| Study year                 | 0.96                   | 0.88, 1.04              | 0.24    |
| Country of Study           |                        |                         |         |
| England                    | 1.46                   | 0.70-3.02               | 0.24    |
| Japan                      | 0.76                   | 0.28-2.04               | 0.50    |
| Norway                     | 0.42                   | 0.10-1.76               | 0.18    |
| USA                        | 1.06                   | 0.51, 2.21              | 0.85    |
| Data type                  |                        |                         |         |
| Administrative             | 1.36                   | 0.71, 2.61              | 0.28    |
| Clinical                   | 0.74                   | 0.38, 1.32              | 0.28    |
| Number of patients         | 1.00                   | 1.00, 1.00              | 0.45    |
| Number of hospitals        | 1.00                   | 1.00, 1.00              | 0.14    |
| Patient age (mean)         | 0.92                   | 0.70, 1.19              | 0.36    |
| Patient gender (% of male) | 0.96                   | 0.88, 1.05              | 0.25    |
| Threshold for HV hospitals | 0.99                   | 0.99, 1.00              | 0.01    |

**B.**

| Explanatory Variable       | Regression Coefficient | 95% Confidence Interval | p Value |
|----------------------------|------------------------|-------------------------|---------|
| Study year                 | 0.96                   | 0.80, 1.14              | 0.51    |
| Country of Study           |                        |                         |         |
| England                    | 1.42                   | 0.46, 4.27              | 0.40    |
| Japan                      | 1.19                   | 0.67, 2.13              | 0.41    |
| USA                        | 0.80                   | 0.51, 1.26              | 0.22    |
| Data type                  |                        |                         |         |
| Administrative             | 1.09                   | 0.61, 1.97              | 0.66    |
| Clinical                   | 0.91                   | 0.51, 1.65              | 0.66    |
| Number of patients         | 1.00                   | 1.00, 1.00              | 0.26    |
| Number of hospitals        | 1.00                   | 0.99, 1.00              | 0.80    |
| Patient age (mean)         | 1.04                   | 0.97, 1.11              | 0.16    |
| Patient gender (% of male) | 0.99                   | 0.80, 1.23              | 0.87    |
| Threshold for HV hospitals | 1.00                   | 0.93, 1.07              | 0.83    |

**S4 Appendix.** List of excluded studies after full-text review and justifications.

| Reference                                                                                                                                                                                                                                                            | Justification                                          |
|----------------------------------------------------------------------------------------------------------------------------------------------------------------------------------------------------------------------------------------------------------------------|--------------------------------------------------------|
| 1. Finlayson EVA, Goodney PP, Birkmeyer JD. Hospital volume and operative mortality in cancer surgery: a national study. <i>Arch Surg.</i> 2003;138(7):721-726.                                                                                                      | Overlapping studied period. Eliminated as per rule 4.  |
| 2. Gilbert SM, Dunn RL, Miller DC, Daignault S, Ye Z, Hollenbeck BK. Mortality After Urologic Cancer Surgery: Impact of Non-index Case Volume. <i>Urology.</i> 2008;71(5):906-910.                                                                                   | Overlapping studied period. Eliminated as per rule 2.  |
| 3. Joudi FN, Allareddy V, Kane CJ, Konety BR. Analysis of complications following partial and total nephrectomy for renal cancer in a population based sample. <i>J Urol.</i> 2007;177(5):1709-1714.                                                                 | Overlapping studied period. Eliminated as per rule 2.  |
| 4. Joudi FN, Konety BR. The impact of provider volume on outcomes from urological cancer therapy. <i>J Urol.</i> 2005;174(2):432-438.                                                                                                                                | Review                                                 |
| 5. Joudi FN, Konety BR. The volume/outcome relationship in urologic cancer surgery. <i>Support Cancer Ther.</i> 2004;2(1):42-46.                                                                                                                                     | Review                                                 |
| 6. Killen SD, O'Sullivan MJ, Coffey JC, Kirwan WO RH. Provider volume and outcomes for oncological procedures. <i>Br J Surg.</i> 2005;92:389-402.                                                                                                                    | Review                                                 |
| 7. Konety BR, Allareddy V, Modak S, Smith B. Mortality after major surgery for urologic cancers in specialized urology hospitals: are they any better? <i>J Clin Oncol.</i> 2006;24(13):2006-2012.                                                                   | Overlapping studied period. Eliminated as per rule 2.  |
| 8. Mayer EK, Purkayastha S, Athanasiou T, Darzi A, Vale JA. Assessing the quality of the volume-outcome relationship in uro-oncology. <i>BJU Int.</i> 2009;103(3):341-349.                                                                                           | Review                                                 |
| 9. Nuttall M, Vandermeulen J, Phillips N, et al. a Systematic Review and Critique of the Literature Relating Hospital or Surgeon Volume To Health Outcomes for 3 Urological Cancer Procedures. <i>J Urol.</i> 2004;172(6):2145-2152.                                 | Review                                                 |
| 10. Penson DF. Mortality after major surgery for urologic cancers in specialized urology hospitals: are they any better? <i>Urol Oncol.</i> 2006;24(5):460.                                                                                                          | Commentary                                             |
| 11. Peyronnet B, Couapel J-P, Patard J-J, Bensalah K. Relationship between surgical volume and outcomes in nephron-sparing surgery. <i>Curr Opin Urol.</i> 2014;24(5):453-458.                                                                                       | Review                                                 |
| 12. Pieper D, Mathes T, Neugebauer E, Eikermann M. State of evidence on the relationship between high-volume hospitals and outcomes in surgery: a systematic review of systematic reviews. <i>J Am Coll Surg.</i> 2013;216(5):1015-1025.                             | Review                                                 |
| 13. Sugihara T, Yasunaga H, Horiguchi H, et al. Performance comparisons in major uro-oncological surgeries between the USA and Japan. <i>Int J Urol.</i> 2014;21(11):1145-1150.                                                                                      | Volume-outcome relationship not described              |
| 14. Trinh QD, Schmitges J, Sun M, et al. Does partial nephrectomy at an academic institution result in better outcomes? <i>World J Urol.</i> 2012;30(4):505-510.                                                                                                     | Overlapping studied period. Eliminated as per rule 2.  |
| 15. Wang HH, Tejwani R, Zhang H, Wiener JS, Routh JC. Hospital Surgical Volume and Associated Postoperative Complications of Pediatric Urological Surgery in the United States. <i>J Urol.</i> 2015;194(2):506-511.                                                  | Paediatric cohort                                      |
| 16. Fernando A, Fowler S, O'Brien T, et al. Nephron-sparing surgery across a nation - Outcomes from the British Association of Urological Surgeons 2012 national partial nephrectomy audit. <i>BJU Int.</i> 2016;117(6):874-82.                                      | Volume-outcome relationship not described              |
| 17. Tinay I, Gelpi-Hammerschmidt F, Leow JJ, et al. Trends in utilisation, perioperative outcomes, and costs of nephroureterectomies in the management of upper tract urothelial carcinoma: A 10-year population-based analysis. <i>BJU Int.</i> 2016;117(6):954-60. | Volume-outcome relationship in nephroureterectomy only |

# BMJ Open

## Influence of Hospital Volume on Nephrectomy Mortality and Complications: A Systematic Review and Meta-Analysis Stratified by Surgical Type

|                                 |                                                                                                                                                                                                                                                                                                                                                                                                                                                                                                                                                                                                                                                                                                                                                                                                           |
|---------------------------------|-----------------------------------------------------------------------------------------------------------------------------------------------------------------------------------------------------------------------------------------------------------------------------------------------------------------------------------------------------------------------------------------------------------------------------------------------------------------------------------------------------------------------------------------------------------------------------------------------------------------------------------------------------------------------------------------------------------------------------------------------------------------------------------------------------------|
| Journal:                        | <i>BMJ Open</i>                                                                                                                                                                                                                                                                                                                                                                                                                                                                                                                                                                                                                                                                                                                                                                                           |
| Manuscript ID                   | bmjopen-2017-016833.R1                                                                                                                                                                                                                                                                                                                                                                                                                                                                                                                                                                                                                                                                                                                                                                                    |
| Article Type:                   | Research                                                                                                                                                                                                                                                                                                                                                                                                                                                                                                                                                                                                                                                                                                                                                                                                  |
| Date Submitted by the Author:   | 22-May-2017                                                                                                                                                                                                                                                                                                                                                                                                                                                                                                                                                                                                                                                                                                                                                                                               |
| Complete List of Authors:       | Hsu, Ray; University of Cambridge, Academic Urology Group, Department of Surgery; Cambridge University Hospitals NHS Foundation Trust, Department of Urology<br>Salika, Theodosia; University College London, Department of Epidemiology & Public Health, Health Behaviour Research Centre<br>Maw, Jonathan; Cambridge University Hospitals NHS Foundation Trust, Department of Urology<br>Lyratzopoulos, Georgios ; University College London, Department of Epidemiology & Public Health, Health Behaviour Research Centre<br>Gnanapragasam, Vincent; University of Cambridge, Academic Urology Group, Department of Surgery; Cambridge University Hospitals NHS Foundation Trust, Department of Urology<br>Armitage, James; Cambridge University Hospitals NHS Foundation Trust, Department of Urology |
| <b>Primary Subject Heading</b>: | Health services research                                                                                                                                                                                                                                                                                                                                                                                                                                                                                                                                                                                                                                                                                                                                                                                  |
| Secondary Subject Heading:      | Urology, Surgery                                                                                                                                                                                                                                                                                                                                                                                                                                                                                                                                                                                                                                                                                                                                                                                          |
| Keywords:                       | Hospital Volume, Nephrectomy, Nephrectomy Mortality, Nephrectomy Complications, Kidney & urinary tract disorders < UROLOGY, Urological tumours < UROLOGY                                                                                                                                                                                                                                                                                                                                                                                                                                                                                                                                                                                                                                                  |

SCHOLARONE™  
Manuscripts

1  
2  
3 **INFLUENCE OF HOSPITAL VOLUME ON NEPHRECTOMY MORTALITY AND COMPLICATIONS:**  
4  
5 **A SYSTEMATIC REVIEW AND META-ANALYSIS STRATIFIED BY SURGICAL TYPE**  
6  
7

8  
9  
10 Ray CJ Hsu,<sup>1,2</sup> Theodosia Salika,<sup>3</sup> Jonathan Maw,<sup>2</sup> Georgios Lyratzopoulos,<sup>3</sup> Vincent J  
11  
12 Gnanapragasam,<sup>1,2,†</sup> James N Armitage,<sup>2,†</sup>  
13  
14

15  
16  
17 <sup>1</sup>Academic Urology Group, Department of Surgery, University of Cambridge, Cambridge  
18  
19 Biomedical Campus, Hills Road, Cambridge, UK, CB2 0QQ  
20

21  
22 <sup>2</sup>Department of Urology, Addenbrooke's Hospital, Cambridge University Hospitals NHS  
23  
24 Foundation Trust, Hills Road, Cambridge, UK, CB2 0QQ  
25

26  
27 <sup>3</sup>Health Behaviour Research Centre, Department of Epidemiology and Public Health,  
28  
29 University College London, 1-19 Torrington Place, London, UK, WC1E 6BT  
30

31 <sup>†</sup>Joint senior authors.  
32  
33

34  
35  
36 Corresponding author: Ray CJ Hsu  
37

38 E-mail address: rch72@cam.ac.uk  
39  
40

41  
42  
43 Word count: 3,801  
44  
45  
46  
47  
48  
49  
50  
51  
52  
53  
54  
55  
56  
57  
58  
59  
60



## ABSTRACT

### Objectives

The provision of complex surgery is increasingly centralised to high volume specialist hospitals. Evidence to support nephrectomy centralisation however has been inconsistent. We conducted a systematic review and meta-analysis to determine the association between hospital case volumes and perioperative outcomes in radical nephrectomy, partial nephrectomy and nephrectomy with venous thrombectomy.

### Methods

Medline, Embase and the Cochrane Library were searched for relevant studies published between 1990 and 2016. Pooled effect estimates for nephrectomy mortality and complications were calculated for each nephrectomy type using the DerSimonian and Laird random-effects model. Sensitivity analyses were performed to examine the effects of heterogeneity on the pooled effect estimates by excluding studies with the heaviest weighting, lowest methodological score, and most likely to introduce bias from misclassification of standardised hospital volume.

### Results

Some 226,372 patients from sixteen publications were included in our review and meta-analysis. Considerable between-study heterogeneity was noted and only a few reported volume-outcome relationships specifically in partial nephrectomy or nephrectomy with venous thrombectomy.

1  
2  
3 High volume hospitals were correlated with a 26% and 52% reduction in mortality for radical  
4  
5 nephrectomy (OR 0.74, 95% CI 0.61-0.90,  $p<0.01$ ) and nephrectomy with venous  
6  
7 thrombectomy (OR 0.48, 95% CI 0.29-0.81,  $p<0.01$ ) respectively. In addition, radical  
8  
9 nephrectomy in high volume hospitals was associated with an 18% reduction in  
10  
11 complications (OR 0.82, 95% CI 0.73-0.92,  $p<0.01$ ). No significant volume-outcome  
12  
13 relationship in mortality (OR 0.84, 95% CI 0.31-2.26,  $p=0.73$ ) or complications (OR 0.85, 95%  
14  
15 CI 0.55-1.30,  $p=0.44$ ) was observed for partial nephrectomy.  
16  
17  
18  
19  
20  
21

## 22 **Conclusions**

23  
24 Our findings suggest that patients undergoing radical nephrectomy have improved  
25  
26 outcomes when treated by high volume hospitals. Evidence of this in partial nephrectomy  
27  
28 and nephrectomy with venous thrombectomy is however not yet clear and could be  
29  
30 secondary to the low number of studies included and the small patient number in our  
31  
32 analyses. Further investigation is warranted to establish the full potential of nephrectomy  
33  
34 centralisation particularly as existing evidence is of low quality with significant heterogeneity.  
35  
36  
37  
38  
39  
40  
41  
42  
43  
44  
45  
46  
47  
48  
49  
50  
51  
52  
53  
54  
55  
56  
57  
58  
59  
60

### STRENGTH & LIMITATIONS OF THIS STUDY

- This is a contemporary systematic review and meta-analysis of the associations between hospital case volumes and nephrectomy outcomes.
- Sixteen primary studies, which is four folds greater in number than previous meta-analyses, were used to synthesised the pooled effect estimates for nephrectomy mortality and complications.
- To the best of our knowledge, this is the first study to date to stratify analyses based on nephrectomy type to account for differences in technical complexity and rates of adverse outcomes.
- Current evidence in nephrectomy outcome-volume relationship is of low quality and considerable heterogeneity exists between studies in design, type of data used, outcomes measured and statistical methodologies.
- Our study highlights the limitations in existing evidence and suggests questions that should be addressed in future research.

## INTRODUCTION

In recent years, there has been an emerging trend for the centralisation of complex operations in healthcare systems around the world [1–3]. This shift is supported by the growing research and evidence suggesting that hospitals and surgeons with high case loads have better patient outcomes [4–8]. Proponents argue that centralisation allows more effective use of clinical expertise and specialist equipment, and the increased exposure improves surgical skills and provides better training opportunities. Centralisation can also facilitate quicker adoption of care pathways, such as enhanced recovery, and may have more long-term financial sustainability for hospitals. However, surgical centralisation requires further travel distance and limits patient choice when many would prefer to undergo surgery locally even if greater mortality risks are taken into consideration [9]. Differences in disease biology, surgical complexity and rate of adverse outcomes may also limit the perceived benefits of centralisation. Such a health service model may therefore not be appropriate for all conditions and operations.

Renal cancer accounts for over 2% of all new cancer diagnoses worldwide affecting more than 330,000 individuals annually [10]. Widespread use of cross-sectional imaging and increasing prevalence of obesity have contributed to a rising renal cancer incidence in many countries [11–13]. Despite recent developments in systemic therapies, nephrectomy is often considered the only potentially curative treatment for renal cancer, and the number of nephrectomies being performed is likely to increase as a result. It is therefore critical that health service providers understand the effects that organisational changes may have on patient outcomes. While there has been an expansion of volume-outcome research, no consensus has so far been reached on the efficacy of centralising nephrectomy, and many

1  
2  
3 uncertainties remain about its potential benefits particularly as radical and partial  
4  
5 nephrectomy carry different surgical complexities and outcomes [14,15]. We present a  
6  
7 contemporary systematic review and meta-analysis of the published literature on the  
8  
9 association between hospital case volumes and perioperative outcomes stratified by  
10  
11 nephrectomy types. We hypothesise that outcomes significantly improve with higher  
12  
13 nephrectomy case volumes.  
14  
15  
16  
17  
18  
19  
20  
21  
22  
23  
24  
25  
26  
27  
28  
29  
30  
31  
32  
33  
34  
35  
36  
37  
38  
39  
40  
41  
42  
43  
44  
45  
46  
47  
48  
49  
50  
51  
52  
53  
54  
55  
56  
57  
58  
59  
60

## METHODS

### Search criteria & data extraction

The systematic review and meta-analysis was reported in accordance to the Preferred Reporting Items for Systematic Reviews and Meta-Analyses (PRISMA) guidelines (Appendix 1) [16]. Medical subject heading (MeSH) terms and key words for nephrectomy, case volume and outcomes were used in Medline, Embase and the Cochrane Library to search for relevant studies published between January 1990 and December 2016 (Appendix 2). Studies published prior to 1990 were not considered as recent medical and surgical advancements would have limited their applicability to the modern healthcare system. Only studies published in English were considered as the risk of potential language bias associated with this exclusion generally has little effect on summary effect estimates [17]. References were searched manually for additional relevant studies.

We included studies that presented original data in full-texts on adult nephrectomy outcomes across two or more hospital case volume categories. Abstracts, case reports, and review articles were excluded. No restriction was set on the study design and both prospective and retrospective studies were considered. Only those describing the volume-outcome relationships in radical nephrectomy with or without venous thrombectomy and/or partial nephrectomy were eligible. Paediatric cohorts were excluded as were articles comprised solely of nephroureterectomy or nephrectomy for non-oncological indications. Restriction on the reported outcomes was only applied at the end stage of the search to enable assessment of the current published evidence. Only studies reporting nephrectomy mortality and complications were included in the final analysis.

1  
2  
3 Two investigators (R.C.J.H and J.M.) independently reviewed all studies for inclusion, data  
4  
5 extraction and methodological quality. Any disagreement between the two reviewers was  
6  
7 resolved by discussion and consultation with a third reviewer (J.N.A.). Where only rates of  
8  
9 outcomes were presented, these were applied to the case number to give the number of  
10  
11 events, within the error of the published results. Study authors were contacted for further  
12  
13 clarification if specific rates of outcomes and case numbers were not published [18,19].  
14  
15

16  
17  
18  
19 As the cut-off values for hospital case volume categories differed among studies, we used  
20  
21 the approach adopted by similar previous meta-analyses by dichotomising the volume  
22  
23 groups presented by each study into low volume (LV) and high volume (HV) when the article  
24  
25 presented an even number of volume groupings [20,21]. If a study presented an odd  
26  
27 number of volume groups, the middle group was considered as LV.  
28  
29

30  
31  
32  
33 Methodological quality and potential risk of bias were scored using a ten-domain system  
34  
35 designed to measure the degree in which the study is likely to reveal generalizable  
36  
37 conclusion about the magnitude and nature of the volume-outcome relationship [22,23].  
38  
39 Each domain provides a score between zero and three with a total maximum of 18,  
40  
41 suggesting a well-designed study. The parameters included the representativeness of the  
42  
43 sample, the number of hospitals analysed, the samples size, the number of adverse events  
44  
45 recorded, the appropriateness of patient selection, the number of volume categories  
46  
47 examined, the number of outcomes measured, the degree of risk adjustment performed,  
48  
49 whether hospital and surgeon case volumes were analysed in conjunction, and whether  
50  
51 clinical processes of care were measured.  
52  
53  
54  
55  
56  
57  
58  
59  
60

1  
2  
3 If studies extracted data from the same source with overlaps in the study periods, we  
4  
5 employed the following rules to avoid duplicating populations: 1) studies with identical  
6  
7 patient cohort but examining different outcomes were considered and analysed separately;  
8  
9  
10 2) studies that derived data from older datasets were excluded in favour of the more  
11  
12 contemporary cohort; 3) if the above rules were not applicable, studies with the lower  
13  
14 methodological quality scores were excluded; 4) where quality scores were equal, the study  
15  
16 covering the longest period was included.  
17  
18  
19  
20

### 21 **Quantitative data synthesis**

22  
23 All statistical analyses were performed using Stata 14 [24]. Nephrectomy types were  
24  
25 categorised into radical nephrectomy, partial nephrectomy and nephrectomy with venous  
26  
27 thrombectomy and analysed separately. Studies involving multiple types of nephrectomies  
28  
29 were analysed based on the aforementioned groups, but if this was not feasible, they were  
30  
31 categorised as radical nephrectomy. With the assumption that a distribution of effects exists  
32  
33 amongst studies, all pooled effect size were calculated using the DerSimonian and Laird  
34  
35 random-effects model, which provided more conservative estimates compared to fixed-  
36  
37 effect model. Odds ratio (OR) and 95% confidence interval (CI) were calculated and  
38  
39 presented for each outcome measure using LV groups as the reference.  
40  
41  
42  
43  
44  
45  
46  
47

48 When the meta-analysis demonstrated significantly better outcomes in HV hospitals, we  
49  
50 quantified the clinical effectiveness of centralisation by calculating the numbers needed to  
51  
52 treat, or in our case numbers needed to centralise (NNC). NNC represents the number of  
53  
54 cases that will need to be centralised from LV hospitals and treated by HV hospitals in order  
55  
56 to prevent one adverse event.  
57  
58  
59  
60



### Heterogeneity

As the DerSimonian and Laird model would have only accounted for some between-study heterogeneity, we further quantified heterogeneity by calculating  $I^2$  statistic.  $I^2$  provides an easily understood number, which describes the proportion of total variation in estimates that is due to heterogeneity rather than chance [25]. Values of 25% or lower denote low heterogeneity and values of 75% or greater denote considerable heterogeneity [26]. Meta-regression was performed to explore the influence of potential explanatory variables on heterogeneity including each study's publication year, country, data source, number of patients and their demographics, number of hospitals, and threshold for HV hospitals.

### Publication bias

Funnel plots were generated to investigate potential publication bias, and were enhanced to include contours that divide the funnel into statistically significant and non-significant areas. Funnel plot symmetry suggests low probability of publication bias and Harbord's modified test was used to test for asymmetry [27]. Harbord's test reduces false positive rates when applied to binary outcome data, especially when there is low between-study heterogeneity. Trim and fill method was also performed to account for publication bias by adjusting the meta-analysis to incorporate the theoretically missing studies [28].

### Sensitivity analysis

To examine specific studies' effects on pooled effect size, sensitivity analyses were performed by excluding individual studies and repeating the meta-analyses. We examined the effects of studies with the heaviest weighting and studies with the lowest

1  
2  
3 methodological quality score. As there is currently no consensus on what nephrectomy case  
4  
5 volume is necessary to be considered as HV, we repeated our analyses by excluding studies  
6  
7 whose standardised HV categories overlapped most significantly with the standardised LV  
8  
9 categories in other studies to account for potential bias of misclassifying volume categories  
10  
11 in our dichotomy.  
12  
13

14  
15  
16  
17 As secondary analyses, we additionally repeated the meta-analysis three further times with  
18  
19 different methods of dichotomising the volume groups to examine whether our initial  
20  
21 estimates would remain consistent. The methods of dichotomising were 1) lowest volume  
22  
23 categories and all others 2) even dichotomy and when studies present an odd number of  
24  
25 volume categories, the middle group was considered as HV 3) highest volume categories and  
26  
27 all others.  
28  
29  
30  
31  
32  
33  
34  
35  
36  
37  
38  
39  
40  
41  
42  
43  
44  
45  
46  
47  
48  
49  
50  
51  
52  
53  
54  
55  
56  
57  
58  
59  
60

## RESULTS

### Study selection & characteristics

From the 5,680 articles initially identified, 16 were included in the systematic review containing 226,372 patients from six countries (Figure 1). For the meta-analysis, eleven studies with 201,506 patients examining radical nephrectomy were included while four studies of 23,617 patients and two studies of 1,249 patients examining partial nephrectomy and nephrectomy with venous thrombectomy were included respectively. Publication year ranged from 2002 to 2016, while cohort periods covered from 1993 to 2013.

Tables 1 summarises the characteristics of the included studies. Variations were observed in study designs including source of data and outcomes measured. Out of a maximum possible score of 18, the median quality score from the included studies was 9 (interquartile range 8 – 9) with the majority of the studies failing to adequately address potential confounders including measuring the appropriateness of patient selection, adjusting for case-mix variations and accounting for differences in clinical risks and processes of care (Appendix 3). Variable thresholds for HV hospitals were noted across the included studies.

Table 1. Characteristics and methodological summary of studies.

| Reference                           | Study Characteristics |         |           |           |                 |                  |                  |                   | Outcomes Measured     |                                                                                                                             |             |     |             |                                   | Case Mix                                                                       | Quality Score (18) |
|-------------------------------------|-----------------------|---------|-----------|-----------|-----------------|------------------|------------------|-------------------|-----------------------|-----------------------------------------------------------------------------------------------------------------------------|-------------|-----|-------------|-----------------------------------|--------------------------------------------------------------------------------|--------------------|
|                                     | Year                  | Country | Period    | Data Type | No. of Patients | No. of Hospitals | Low <sup>a</sup> | High <sup>a</sup> | Mortality             | Complications (breakdowns)                                                                                                  | Transfusion | LOS | Conversions | Others                            |                                                                                |                    |
| <b>Radical Nephrectomy</b>          |                       |         |           |           |                 |                  |                  |                   |                       |                                                                                                                             |             |     |             |                                   |                                                                                |                    |
| Hjelle[29]                          | 2016                  | Norway  | 2008-2013 | Admin     | 3,273           | 40               | 20               | 40                | 30-day                | -                                                                                                                           | -           | -   | +           | -                                 | Demographics, tumour stage, nephrectomy type                                   | 8                  |
| Becker[30]/<br>Sun[31] <sup>b</sup> | 2014 / 2012           | USA     | 1998-2007 | Admin     | 48,172          | N/S              | 5                | 16                | In-hospital           | + (17 events inc haemorrhage, cardiac arrest, infection, wound disruption, seroma, pneumothorax, VTE etc)                   | +           | +   | -           | -                                 | Demographics, co-morbidity, nephrectomy type, laparoscopy, payer/hospital type | 9                  |
| Hanchanale[32]                      | 2010                  | England | 1998-2005 | Admin     | 20,672          | 1,181            | 14               | 35                | In-hospital           | -                                                                                                                           | -           | +   | -           | -                                 | Demographics                                                                   | 9                  |
| Yasunaga[33]                        | 2010                  | Japan   | 2006-2007 | Admin     | 7,988           | 646              | 26               | 65                | In-hospital           | + (11 events inc surgical site infection, UTI, VTE, sepsis, ileus, stroke, cardiac events, renal, failure, peritonitis etc) | -           | -   | -           | -                                 | Demographics, co-morbidity, laparoscopy, hospital type, tumour location        | 9                  |
| Mitchell[34]                        | 2009                  | USA     | 2003-2007 | Clinical  | 42,988          | 134              | 99/4.5yr         | 500/4.5yr         | In-hospital           | + (not specified)                                                                                                           | -           | +   | -           | ICU admission                     | None                                                                           | 9                  |
| Yasunaga[18]                        | 2008                  | Japan   | 2006-2007 | Clinical  | 1,704           | 461              | 9                | 40                | In-hospital           | + (wound infection, pneumonia, ileus, renal dysfunction, others)                                                            | -           | -   | -           | OT, EBL                           | Demographics, co-morbidity, laparoscopy, tumour stage & location               | 11                 |
| Davenport[35]                       | 2005                  | England | 2004      | Clinical  | 598             | 48               | <1/mo            | >1/mo             | N/S                   | + (12 events inc bleeding, bowel injury, GI bleed, renal failure, pneumothorax, VTE, MI, splenic injury etc)                | +           | -   | +           | OT                                | None                                                                           | 4                  |
| Keoghane[36]                        | 2004                  | England | 2001-2002 | Clinical  | 263             | 25               | 5                | 6                 | -                     | + (16 events inc renal failure, sepsis, wound infection, bowel injury, incisional hernia, perihaptic collection etc)        | -           | -   | +           | -                                 | None                                                                           | 3                  |
| Taub[37]                            | 2004                  | USA     | 1993-1997 | Admin     | 16,858          | 962              | 14               | 34                | In-hospital           | -                                                                                                                           | -           | +   | -           | -                                 | Demographics, co-morbidity, admission acuity                                   | 9                  |
| Birkmeyer[38]                       | 2002                  | USA     | 1994-1999 | Admin     | 58,990          | 3,292            | 6                | 33                | 30-day or In-hospital | -                                                                                                                           | -           | -   | -           | -                                 | Demographics, co-morbidity, admission acuity                                   | 7                  |
| <b>Partial Nephrectomy</b>          |                       |         |           |           |                 |                  |                  |                   |                       |                                                                                                                             |             |     |             |                                   |                                                                                |                    |
| Couapel[39]                         | 2014                  | France  | 2010      | Clinical  | 570             | 53               | 4/7mo            | 19/7mo            | N/S                   | + (medical and surgical events, not further specified)                                                                      | -           | +   | +           | OT, EBL, Totalisation, +ve margin | N/S                                                                            | 8                  |

1  
2  
3  
4  
5  
6  
7  
8  
9  
10  
11  
12  
13  
14  
15  
16  
17  
18  
19  
20  
21  
22  
23  
24  
25  
26  
27  
28  
29  
30  
31  
32  
33  
34  
35  
36  
37  
38  
39  
40  
41  
42  
43  
44  
45  
46  
47  
48  
49

|                                             |      |        |           |       |        |     |          |          |             |                                                                                                                     |   |   |   |               |                                                          |    |
|---------------------------------------------|------|--------|-----------|-------|--------|-----|----------|----------|-------------|---------------------------------------------------------------------------------------------------------------------|---|---|---|---------------|----------------------------------------------------------|----|
| Monn[40]                                    | 2014 | USA    | 2009-2011 | Admin | 17,583 | 322 | 13       | 35       | -           | + (organ based complications not further specified, pain, seroma, shock, haematoma, hypotension, VTE, pneumothorax) | + | + | - | Hospital cost | Demographics, co-morbidity, payer, region, hospital type | 9  |
| Abouassaly[41]                              | 2012 | Canada | 1998-2008 | Admin | 4,292  | 181 | 146/10yr | 797/10yr | In-hospital | + (not specified)                                                                                                   | - | - | - | -             | Demographics, co-morbidity, region                       | 12 |
| Taub[37]                                    | 2004 | USA    | 1993-1997 | Admin | 1,172  | 962 | 14       | 34       | In-hospital | -                                                                                                                   | - | + | - | -             | Demographics, co-morbidity, admission acuity             | 9  |
| <b>Nephrectomy with Venous Thrombectomy</b> |      |        |           |       |        |     |          |          |             |                                                                                                                     |   |   |   |               |                                                          |    |
| Toren[42]                                   | 2013 | Canada | 1998-2008 | Admin | 816    | 120 | N/S      | N/S      | In-hospital | + (40 medical and surgical events inc MI, CHF, PE, infection, organ injury, pneumothorax etc)                       | + | - | - | -             | Demographics, co-morbidity, region                       | 11 |
| Yap[19]                                     | 2012 | Canada | 1995-2004 | Admin | 433    | N/S | 2/10yr   | 8/10yr   | 30-day      | -                                                                                                                   | - | - | - | -             | Demographics                                             | 11 |

<sup>a</sup>Low, cut-off value for lowest volume group; high, cut-off value for highest-volume group. Volume units are cases per year unless specified. <sup>b</sup>Becker and Sun were equal in the data source used, outcomes evaluated, periods covered and quality scores, but employed different analyses to evaluate the benefit of regionalisation and volume-outcome relationship in nephrectomy [30,31]. We therefore treated them as one single cohort, with no duplicates in our analysis. Admin: Administrative. N/S: Not specified. VTE: venous thromboembolism. MI: Myocardial infarction. CHF: Congestive heart failure. PE: Pulmonary embolism. UTI: Urinary tract infection. GI: Gastrointestinal. OT: Operating time. EBL: Estimated blood loss. ICU: Intensive care unit.

## Mortality and Hospital Volumes

Post-operative mortality, defined as in-patient or 30-day, was the most frequently examined outcome, reported in fourteen studies. Ten studies reported mortality in radical nephrectomy [18,29–35,37,38], three in partial nephrectomy [37,39,41] and two in nephrectomy with venous thrombectomy [19,42]. The overall mortality was 1.59% (range 0.20-7.2) with mortality rates in HV and LV hospitals being 1.47% and 1.68% respectively.

### *Radical Nephrectomy*

Meta-analysis demonstrated that patients who underwent radical nephrectomy in HV hospitals had a 26% reduction (OR 0.74, 95% CI 0.61-0.90,  $p < 0.01$ ) in post-operative mortality, corresponding to a NNC of 234 (Figure 2A). Significant heterogeneity was observed ( $I^2$  75.0%,  $p < 0.01$ ). Meta-regression was performed to investigate the potential explanatory variables for heterogeneity, and only differences in the threshold values for HV hospitals were shown to be a significant contributor (Appendix 4A). Subgroup analysis of the three studies examining exclusively radical nephrectomies demonstrated a more pronounced reduction in post-operative mortality favouring HV hospitals (OR 0.62, 95% CI 0.53-0.71,  $p < 0.01$ ) [18,34,37]. This corresponded to a lower NNC of 166 with little residual heterogeneity ( $I^2$  0.0 %,  $p = 0.40$ ). The overall funnel plot was visually asymmetrical particularly missing studies with effect estimates favouring LV hospitals (Figure 3). However, the Harbord's modified test did not show significant asymmetry ( $p = 0.40$ ) and "trim and fill" method did not change the initial estimate, indicating no clear evidence of publication bias. In sensitivity analyses, exclusion of the most heavily weighted study led to a similar pooled-effect estimate (OR 0.70, 95% CI 0.55-0.88,  $p < 0.01$ ) [38]. Exclusion of the study with the lowest quality score also did not significantly alter our result (OR 0.74, 95% CI 0.61-0.91,

1  
2  
3 p<0.01) [35]. To examine the potential bias introduced by misclassification of hospital  
4  
5 volume, two cohorts were excluded [30,31,35]. This did not substantially change our pooled-  
6  
7 effect estimate either (OR 0.73, 95% CI 0.58-0.93, p=0.01). Overall, radical nephrectomies in  
8  
9 HV hospitals appeared to have significantly lower mortality.  
10  
11

### 12 13 14 15 *Partial Nephrectomy*

16  
17 Meta-analysis showed that partial nephrectomy patients operated in HV hospitals had a 16%  
18  
19 reduction in post-operative mortality but this was not statistically significant (OR 0.84, 95%  
20  
21 CI 0.31-2.26, p=0.73) (Figure 2B). Moderate but non-significant heterogeneity was noted ( $I^2$   
22  
23 36.84 %, p=0.21). Sensitivity analyses removing studies with the heaviest weighting [41] or  
24  
25 most likely to introduce misclassification bias of exposure [39] demonstrated reduced  
26  
27 mortality favouring HV hospitals, but these remained non-significant.  
28  
29  
30  
31

### 32 33 34 *Nephrectomy with Venous Thrombectomy*

35  
36 Patients who underwent nephrectomy with venous thrombectomy in HV hospitals had a  
37  
38 52% reduction (OR 0.48, 95% CI 0.29-0.81, p<0.01) in short-term mortality compared to LV  
39  
40 hospitals (Figure 2C). This corresponded to a NNC of 25 with low heterogeneity ( $I^2$  0.0 %,  
41  
42 p=0.50). Due to the small number of studies reporting this outcome, further testing of  
43  
44 heterogeneity and publication bias was not expected to generate meaningful results and this  
45  
46 was not attempted.  
47  
48  
49

### 50 51 52 **Complications and Hospital Volumes**

53  
54  
55 Complication was the second most frequently investigated outcome, reported in eleven  
56  
57 studies. Events considered as a complication differed among studies (Table 1). Seven studies  
58  
59  
60

1  
2  
3 reported complications in radical nephrectomy [18,30,31,33–36] and three in partial  
4  
5 nephrectomy [39–41]. Only one study examined volume-outcome relationship in  
6  
7 nephrectomy with venous thrombectomy and meta-analysis was therefore not appropriate  
8  
9 [42]. The overall complication rate was 16.26% (range 7.4-78). HV hospitals had complication  
10  
11 rates of 15.00% compared to 17.51% in LV hospitals.  
12  
13

### 14 15 16 17 *Radical Nephrectomy*

18  
19 Meta-analysis showed an 18% reduction (OR 0.82, 95% CI 0.73-0.92,  $p < 0.01$ ) in nephrectomy  
20  
21 complications in HV centres, corresponding to a NNC of 38 (Figure 4A). Significant  
22  
23 heterogeneity was noted ( $I^2$  76.25%,  $p < 0.01$ ), but none of the factors examined in meta-  
24  
25 regression significantly contributed to this (Appendix 4B). Sensitivity analyses by removing  
26  
27 studies with the lowest quality [36] or most likely to introduce misclassification bias of  
28  
29 exposure [35,36] did not significantly alter our initial result. Excluding study with the  
30  
31 heaviest weighting however led to a loss of significance in the pooled-effect estimate, which  
32  
33 however still demonstrated a 11% reduction in complications in HV hospitals (OR 0.89, 95%  
34  
35 CI 0.74-1.08,  $p = 0.24$ ). Overall, radical nephrectomies performed in HV hospitals appeared to  
36  
37 have significantly lower complications compared to LV hospitals.  
38  
39  
40  
41  
42  
43  
44

### 45 46 *Partial Nephrectomy*

47  
48 Partial nephrectomy patients operated in HV hospitals had a 15% reduction in complications,  
49  
50 but this was not statistically significant (OR 0.85, 95% CI 0.55-1.30,  $p = 0.44$ ) (Figure 4B).  
51  
52 Significant heterogeneity was noted ( $I^2$  94.80%,  $p < 0.01$ ). Sensitivity analysis by removing  
53  
54 studies with the heaviest weighting [40] or most likely to introduce misclassification bias of  
55  
56 hospital volume [39] did not result in significance.  
57  
58  
59  
60



### Secondary analyses using different methods for dichotomising HV and LV

As there is no consensus on what constituted HV hospitals in current evidence, simple dichotomy of volume groups may introduce inherent bias to the estimates. Yet no recommendation on how best to proceed in volume-outcome analysis presently exists.

In our secondary analyses, we consistently observed significantly lower risks of mortality for both radical nephrectomy and nephrectomy with venous thrombectomy in HV hospitals regardless how volumes were dichotomised (Table 2). The magnitudes of risk reductions were more pronounced when higher thresholds for HV hospitals were considered particularly for radical nephrectomy mortality. Partial nephrectomy mortality however continued to demonstrate no significant association to volume even when dichotomies were comparing the highest volume groups to all others.

Risks of radical nephrectomy complications remained significantly reduced in HV hospitals when the dichotomy threshold for HV hospitals was increased, but the significance was lost when the thresholds were lowered. Association between hospital volumes and partial nephrectomy complications remained insignificant regardless of how HV was defined in our dichotomy.

**Table 2:** Results of meta-analysis by using different methods of dichotomising volume groups.

|                                      | Lowest volume group vs. all others     | Even dichotomy, middle group as HV    | Even dichotomy, middle group as LV (Primary analysis) | Highest volume group vs. all others   |
|--------------------------------------|----------------------------------------|---------------------------------------|-------------------------------------------------------|---------------------------------------|
| <b>Mortality</b>                     |                                        |                                       |                                                       |                                       |
| Radical Nephrectomy                  | OR: 0.82<br>95%CI 0.71-0.94<br>p=0.01  | OR: 0.83<br>95%CI 0.72-0.95<br>p<0.01 | OR: 0.74<br>95%CI 0.61-0.90<br>p<0.01                 | OR: 0.72<br>95%CI 0.61-0.85<br>p<0.01 |
| Partial Nephrectomy                  | OR: 0.48<br>95%CI 0.18-1.31<br>p=0.15  | OR: 0.67<br>95%CI 0.17-2.75<br>p=0.58 | OR: 0.84<br>95%CI 0.31-2.26<br>p=0.73                 | OR: 0.93<br>95%CI 0.31-2.77<br>p=0.90 |
| Nephrectomy with Venous Thrombectomy | OR: 0.59<br>95%CI 0.35-0.99<br>p=0.045 | OR: 0.46<br>95%CI 0.27-0.80<br>p<0.01 | OR: 0.48<br>95%CI 0.29-0.81<br>p=0.01                 | OR: 0.48<br>95%CI 0.25-0.92<br>p=0.03 |
| <b>Complications</b>                 |                                        |                                       |                                                       |                                       |
| Radical Nephrectomy                  | OR: 0.89<br>95%CI 0.78-1.01<br>p=0.07  | OR: 0.84<br>95%CI 0.68-1.05<br>p=0.13 | OR: 0.82<br>95%CI 0.73-0.92<br>p<0.01                 | OR: 0.82<br>95%CI 0.73-0.92<br>p<0.01 |
| Partial Nephrectomy                  | OR: 0.82<br>95%CI 0.55-1.41<br>p=0.60  | OR: 0.80<br>95%CI 0.47-1.36<br>p=0.40 | OR: 0.85<br>95%CI 0.55-1.30<br>p=0.44                 | OR: 0.81<br>95%CI 0.53-1.24<br>p=0.33 |

## DISCUSSION

Evidence on volume-outcome relationships in complex diseases and procedures has increased substantially in recent years. Many operations have been shown to have improved outcomes in HV centres, but this may not be uniform across all surgeries and benefits have not been associated with volume in percutaneous nephrolithotomy or appendicectomy [43–48]. This meta-analysis provides a contemporary review of the effects of centralisation in nephrectomy outcomes. It reveals significant inverse associations between hospital case volumes for short-term mortality and complications for radical nephrectomy, but evidence of these for partial nephrectomy and nephrectomy with venous thrombectomy remains less compelling.

Considered individually, all but three studies in our review reported lack of associations between hospital volume and nephrectomy mortality [29,37,38]. However, such associations in favour of HV hospitals were apparent when considering the totality of the evidence particularly in radical nephrectomy and venous thrombectomy. This finding is consistent with the only other meta-analysis on nephrectomy volume-outcome relationship published in 2009 but includes four-fold greater number of studies [23]. Our meta-analysis demonstrates that the mortality benefit seen in radical nephrectomy may be relatively small requiring centralisation of 234 patients in order to avoid one death. However, the NNC decreased considerably to 166 in our sensitivity analyses. Coupled with the much lower NNC of 38 for radical nephrectomy complications, there is moderate evidence to support its centralisation.

1  
2  
3 In our analyses, the mortality reduction for venous thrombectomy was observed to be more  
4  
5 pronounced than that in radical nephrectomy. This is consistent with the “practice makes  
6  
7 perfect” hypothesis particularly as venous thrombectomy is a technically more challenging  
8  
9 procedure compared to radical nephrectomy, though interestingly a similar trend was not  
10  
11 observed for partial nephrectomy [49]. These results should however be interpreted taking  
12  
13 into consideration that only a few studies have so far reported on the volume-outcome  
14  
15 relationships for partial nephrectomy and venous thrombectomy and the pooled effect  
16  
17 estimates were synthesised from just two to three publications, thus the overall evidence is  
18  
19 weak. As partial nephrectomy has only been widely adopted in the last two decades and  
20  
21 nephrectomy centralisation also a relatively recent phenomenon, it is likely that more  
22  
23 evidence will emerge in the coming years and repeating the meta-analysis at such point is  
24  
25 warranted [1,50]. This will be of particular importance as partial nephrectomy has been  
26  
27 demonstrated to be a safe procedure and the relatively small number of partial  
28  
29 nephrectomy patients in our meta-analysis might not have been sufficiently powered to  
30  
31 reveal the true presence of a volume-outcome relationship, as evident in our wide  
32  
33 confidence interval [51]. This may also explain the lack of significant association between  
34  
35 partial nephrectomy complications and hospital volumes. With its low mortality and  
36  
37 morbidity rates, other outcome measures such as ischaemic time and negative surgical  
38  
39 margins, are likely to be more appropriate quality markers in volume-outcome analysis, but  
40  
41 these have so far been poorly evaluated.  
42  
43  
44  
45  
46  
47  
48  
49  
50

51  
52 Despite the strict inclusion criteria in our studies, we observed considerable heterogeneity,  
53  
54 especially in the meta-analyses of nephrectomy complications. One explanation for this is  
55  
56 the lack of standardised reporting of complications by individual studies. Harder endpoints  
57  
58  
59  
60

1  
2  
3 as previously discussed could have overcome this. Other more objective outcomes including  
4  
5 transfusion rate and length of stay were reported by four [30,31,35,40] and seven studies  
6  
7 [30–32,34,39,40,52] in our systematic review respectively, but they were not in adequate  
8  
9 numbers to be stratified by nephrectomy types or in sufficiently detailed data to perform  
10  
11 meta-analyses. In addition, variations in the threshold values for HV hospitals likely  
12  
13 contributed to the heterogeneity, although this was not evident in the meta-regression.  
14  
15 Volume was also used as a proxy marker for surgical and care quality, but the precise clinical  
16  
17 processes that may improve patient outcomes were not directly measured or identified. It is  
18  
19 therefore conceivable for some heterogeneity to arise from these unmeasured practices.  
20  
21 Results from the multiple sensitivity analyses to adjust for study differences have however  
22  
23 remained robust and our study would still appear to be informative and relevant. There are  
24  
25 other research designs that may be more appropriate in testing our hypothesis such as  
26  
27 analysis of primary data amalgamated from multiple population cohorts. The considerable  
28  
29 ethical concerns and logistical constraints of this may however be challenging to overcome  
30  
31 and not practically feasible.  
32  
33  
34  
35  
36  
37  
38  
39  
40

41 While there has been an expansion in the studies on nephrectomy volume-outcome  
42  
43 relationship, many questions continue to be unanswered. The proportion of nephrectomy  
44  
45 performed under laparoscopy or robotic assistance is growing [53,54]. There is however a  
46  
47 paucity of evidence specifically investigating this in the volume-outcome context with only  
48  
49 one study examining the differences in perioperative measures in robotic partial  
50  
51 nephrectomy [40]. Three other studies have adjusted surgical techniques in multivariable  
52  
53 regressions, but these did not directly demonstrate the effect of laparoscopic volumes on  
54  
55 surgical outcomes [18,30,33]. Due to the small study number and data quality, it was not  
56  
57  
58  
59  
60

1  
2  
3 possible in this meta-analysis to further sub-stratify each nephrectomy type into open and  
4  
5 minimally invasive and our results should be interpreted taking this limitation into account.  
6  
7

8  
9  
10 Tumour characteristics including TNM stage and grades are well established to significantly  
11  
12 affect and predict nephrectomy mortality, but only two studies have so far adjusted for this  
13  
14 in their analyses [18,29]. Surgeon case volume and degree of specialisation also play  
15  
16 significant roles in determining operative outcome, and can be more important than hospital  
17  
18 case volume alone [45,55–57]. While not the focus of this study, no significant association  
19  
20 was found between surgeon volume and complications in radical nephrectomy [18], but 31%  
21  
22 and 16% reduction in mortality and complications respectively was observed in partial  
23  
24 nephrectomy in HV surgeons [41]. HV surgeons performing nephrectomy with venous  
25  
26 thrombectomy were also reported to have reduced risk of mortality [19], but this was not  
27  
28 observed in a subsequent study [42]. As our analyses were based on crude pooled effect  
29  
30 estimates, future meta-analysis should ideally attempt to adjust for other possible  
31  
32 confounders including patient demographics, socioeconomic status and comorbidities,  
33  
34 although this may be methodologically challenging. It would be of high interest to  
35  
36 understand the interactions between patient characteristics, surgeon volume, surgical  
37  
38 approach, and oncological factors in the volume-outcome relationship and may provide  
39  
40 additional insights to selecting patients that will benefit the most from nephrectomy  
41  
42 centralisation, such as those with multiple comorbidities or advanced disease. Similarly, no  
43  
44 study has examined the long-term benefits of centralising nephrectomy when high volume  
45  
46 centres have been demonstrated to increase oncological survival in other cancer surgeries  
47  
48 [58,59]. Results of this may further influence the recommendations for nephrectomy  
49  
50 centralisation and this is currently being explored in our ongoing work. Other outcomes  
51  
52  
53  
54  
55  
56  
57  
58  
59  
60

1  
2  
3 including long-term risks of chronic kidney disease and cardiovascular morbidities and  
4  
5 patient reported outcome measures may also provide more relevant and holistic  
6  
7 measurements of the potential efficacy of nephrectomy centralisation.  
8  
9

10  
11  
12 Our secondary analyses would suggest that a minimum volume threshold for nephrectomy  
13  
14 likely exist, and beyond that, risks of adverse outcomes may continue to decrease with  
15  
16 further increase in volume. An important limitation of this however is that this minimum  
17  
18 threshold cannot be objectively determined from the current evidence. The specific care  
19  
20 processes that may produce good outcomes, such as access to nurse specialists and clinical  
21  
22 trials, could not be determined from our study. As volume is likely to be a proxy marker for  
23  
24 quality, increasing volume alone in itself is unlikely to reduce adverse results [60]. Future  
25  
26 research should concentrate on identifying the qualitative differences between providers in  
27  
28 order for the contributing good practices to be adopted by lesser performing centres.  
29  
30  
31  
32  
33  
34  
35  
36  
37  
38  
39  
40  
41  
42  
43  
44  
45  
46  
47  
48  
49  
50  
51  
52  
53  
54  
55  
56  
57  
58  
59  
60

**CONCLUSIONS**

Current evidence of the association between hospitals volumes and nephrectomy outcomes is of low quality with considerable between-study heterogeneity. Our meta-analyses demonstrated significant reductions in mortality and complications for patients undergoing radical nephrectomy in HV hospitals. Evidence of this in partial nephrectomy and nephrectomy with venous thrombectomy is not yet clear but warrants further investigations.

For peer review only



**ACKNOWLEDGMENTS**

We would like to acknowledge Annie Herbert for providing valuable critiques of the methodologies.

For peer review only

**CONTRIBUTORS**

RCJH, VJG and JNA contributed to the study conception and design. RCJH, JM and JNA contributed to data acquisition and risk of bias assessment. RCJH, TS, GL, VJG, JNA contributed to statistical analysis, data interpretation and critical manuscript revision. RCJH contributed to drafting the manuscript. RCJH contributed to obtaining funding. GL, VJG and JNA contributed to supervision of the study.

**FUNDING STATEMENT**

This work was supported by Addenbrooke's Charitable Trust, the Royal College of Surgeons of England and The Urology Foundation.

**COMPETING INTEREST STATEMENT**

None declared.

**DATA SHARING STATEMENT**

No additional data are available.

## REFERENCES

- 1 National Institute for Clinical Excellence. Guidance on cancer services: Improving outcomes in urological cancers. London: 2002.
- 2 Cooperberg MR, Modak S, Konety BR. Trends in regionalization of inpatient care for urological malignancies, 1988 to 2002. *J Urol* 2007;**178**:2103–8.
- 3 Boudourakis LD, Wang TS, Roman SA, *et al*. Evolution of the surgeon-volume, patient-outcome relationship. *Ann Surg* 2009;**250**:159–65.
- 4 Birkmeyer JD, Lucas FL, Wennberg DE. Potential benefits of regionalizing major surgery in Medicare patients. *Eff Clin Pract* 1999;**2**:277–83.
- 5 Nguyen NT, Paya M, Stevens CM, *et al*. The relationship between hospital volume and outcome in bariatric surgery at academic medical centers. *Ann Surg* 2004;**240**:586–93.
- 6 Pieper D, Mathes T, Neugebauer E, *et al*. State of evidence on the relationship between high-volume hospitals and outcomes in surgery: a systematic review of systematic reviews. *J Am Coll Surg* 2013;**216**:1015–25.
- 7 Trinh QD, Bjartell A, Freedland SJ, *et al*. A systematic review of the volume-outcome relationship for radical prostatectomy. *Eur Urol* 2013;**64**:786–98.
- 8 Hounscome LS, Verne J, McGrath JS, *et al*. Trends in operative caseload and mortality rates after radical cystectomy for bladder cancer in England for 1998–2010. *Eur Urol* 2015;**67**:1056–62.
- 9 Finlayson SR, Birkmeyer JD, Tosteson AN, *et al*. Patient preferences for location of care: implications for regionalization. *Med Care* 1999;**37**:204–9.
- 10 Ferlay J, Soerjomataram I, Ervik M, *et al*. GLOBOCAN 2012 v1.0, Cancer Incidence and

- 1  
2  
3 Mortality Worldwide: IARC CancerBase No. 11. 2013.<http://globocan.iarc.fr> (accessed  
4  
5 13 Feb2017).  
6  
7
- 8 11 Hollingsworth JM, Miller DC, Daignault S, *et al.* Rising incidence of small renal masses:  
9  
10 A need to reassess treatment effect. *J Natl Cancer Inst* 2006;**98**:1331–4.  
11  
12
- 13 12 Chow W, Dong L, Devesa S. Epidemiology and risk factors for kidney cancer. *Nat Rev*  
14  
15 *Urol* 2010;**7**:245–57. doi:10.1038/nrurol.2010.46.Epidemiology  
16  
17
- 18 13 Znaor A, Lortet-Tieulent J, Laversanne M, *et al.* International variations and trends in  
19  
20 renal cell carcinoma incidence and mortality. *Eur Urol* 2015;**67**:519–30.  
21  
22
- 23 14 Tan H-J, Norton EC, Ye Z, *et al.* Long-term Survival Following Partial vs Radical  
24  
25 Nephrectomy Among Older Patients With Early-Stage Kidney Cancer. *JAMA*  
26  
27 2012;**307**:1629–35.  
28  
29
- 30 15 Kim SP, Thompson RH, Boorjian S a, *et al.* Comparative effectiveness for survival and  
31  
32 renal function of partial and radical nephrectomy for localized renal tumors: a  
33  
34 systematic review and meta-analysis. *J Urol* 2012;**188**:51–7.  
35  
36
- 37 16 Moher D, Liberati A, Tetzlaff J, *et al.* Preferred reporting items for systematic reviews  
38  
39 and meta-analyses: the PRISMA statement. *PLoS Med* 2009;**6**:e1000097.  
40  
41
- 42 17 Jüni P, Holenstein F, Sterne J, *et al.* Direction and impact of language bias in meta-  
43  
44 analyses of controlled trials: empirical study. *Int J Epidemiol* 2002;**31**:115–23.  
45  
46
- 47 18 Yasunaga H, Yanaihara H, Fuji K, *et al.* Influence of hospital and surgeon volumes on  
48  
49 operative time, blood loss and perioperative complications in radical nephrectomy. *Int*  
50  
51 *J Urol* 2008;**15**:688–93.  
52  
53
- 54 19 Yap SA, Horovitz D, Alibhai SMH, *et al.* Predictors of early mortality after radical  
55  
56  
57  
58  
59  
60

- 1  
2  
3 nephrectomy with renal vein or inferior vena cava thrombectomy - a population-  
4 based study. *BJU Int* 2012;**110**:1283–8.  
5  
6  
7  
8 20 Awopetu a. I, Moxey P, Hinchliffe RJ, *et al.* Systematic review and meta-analysis of  
9 the relationship between hospital volume and outcome for lower limb arterial surgery.  
10 *Br J Surg* 2010;**97**:797–803.  
11  
12  
13 21 Holt PJE, Poloniecki JD, Loftus IM, *et al.* Meta-Analysis and Systematic Review of the  
14 Relationship between Hospital Volume and Outcome Following Carotid  
15 Endarterectomy. *Eur J Vasc Endovasc Surg* 2007;**33**:645–51.  
16  
17  
18  
19  
20  
21  
22  
23 22 Halm EA, Lee C, Chassin MR. Is volume related to outcome in health care? a  
24 systematic review and methodologic critique of the literature. *Ann Intern Med*  
25  
26  
27  
28  
29  
30  
31 23 Mayer EK, Purkayastha S, Athanasiou T, *et al.* Assessing the quality of the volume-  
32 outcome relationship in uro-oncology. *BJU Int* 2009;**103**:341–9.  
33  
34  
35  
36 24 StataCorp. Stata Statistical Software: Release 14. 2015.  
37  
38  
39 25 Higgins JPT, Thompson SG. Quantifying heterogeneity in a meta-analysis. *Stat Med*  
40  
41  
42  
43  
44 26 Higgins JPT, Thompson SG, Deeks JJ, *et al.* Measuring inconsistency in meta-analyses.  
45  
46  
47  
48  
49 27 Harbord RM, Egger M, Sterne JAC. A modified test for small-study effects in meta-  
50 analyses of controlled trials with binary endpoints. *Stat Med* 2006;**25**:3443–57.  
51  
52  
53  
54 28 Duval S, Tweedie R. A Nonparametric ‘Trim and Fill’ Method of Accounting for  
55  
56  
57  
58  
59  
60

- 1  
2  
3 29 Hjelle KM, Johannesen TB, Beisland C. Postoperative 30-day Mortality Rates for  
4  
5 Kidney Cancer Are Dependent on Hospital Surgical Volume: Results from a Norwegian  
6  
7 Population-based Study. *Eur Urol Focus*;:1–8.  
8  
9  
10 30 Becker A, Bianchi M, Hansen J, *et al.* Benefit in regionalization of care for patients  
11  
12 treated with nephrectomy: a Nationwide Inpatient Sample. *World J Urol*  
13  
14 2014;**32**:1511–21.  
15  
16  
17 31 Sun M, Bianchi M, Trinh Q-D, *et al.* Hospital volume is a determinant of postoperative  
18  
19 complications, blood transfusion and length of stay after radical or partial  
20  
21 nephrectomy. *J Urol* 2012;**187**:405–10.  
22  
23  
24 32 Hanchanale VS, Javlé P. Impact of hospital provider volume on outcome for radical  
25  
26 urological cancer surgery in England. *Urol Int* 2010;**85**:11–5.  
27  
28  
29 33 Yasunaga H, Yanaihara H, Fuji K, *et al.* Impact of hospital volume on postoperative  
30  
31 complications and in-hospital mortality after renal surgery: data from the Japanese  
32  
33 Diagnosis Procedure Combination database. *Urology* 2010;**76**:548–52.  
34  
35  
36 34 Mitchell RE, Lee BT, Cookson MS, *et al.* Radical nephrectomy surgical outcomes in the  
37  
38 University HealthSystem Consortium data base: impact of hospital case volume,  
39  
40 hospital size, and geographic location on 40,000 patients. *Cancer* 2009;**115**:2447–52.  
41  
42  
43 35 Davenport K, Timoney AG, X KF, *et al.* A 3-year review of The British Association of  
44  
45 Urological Surgeons Section of Endourology Laparoscopic Nephrectomy Audit. *BJU Int*  
46  
47 2006;**97**:333–7.  
48  
49  
50 36 Keoghane SR, Keeley FX, Timoney AG, *et al.* The British Association of Urological  
51  
52 Surgeons section of endourology audit of laparoscopic nephrectomy. *BJU Int*  
53  
54 2004;**94**:577–81.  
55  
56  
57  
58  
59  
60

- 1  
2  
3 37 Taub DA, Miller DC, Cowan JA, *et al.* Impact of surgical volume on mortality and length  
4 of stay after nephrectomy. *Urology* 2004;**63**:862–7.  
5  
6  
7  
8 38 Birkmeyer JD, Siewers AE, Finlayson EVA, *et al.* Hospital volume and surgical mortality  
9 in the United States. *N Engl J Med* 2002;**346**:1128–37.  
10  
11  
12  
13 39 Couapel J-P, Bensalah K, Bernhard J-C, *et al.* Is there a volume–outcome relationship  
14 for partial nephrectomy? *World J Urol* 2014;**32**:1323–9.  
15  
16  
17  
18 40 Monn MF, Bahler CD, Flack CK, *et al.* The impact of hospital volume on postoperative  
19 complications following robot-assisted partial nephrectomy. *J Endourol*  
20  
21 2014;**28**:1231–6.  
22  
23  
24  
25  
26 41 Abouassaly R, Finelli A, Tomlinson GA, *et al.* Volume-outcome relationships in the  
27 treatment of renal tumors. *J Urol* 2012;**187**:1984–8.  
28  
29  
30  
31 42 Toren P, Abouassaly R, Timilshina N, *et al.* Results of a national population-based  
32 study of outcomes of surgery for renal tumors associated with inferior vena cava  
33 thrombus. *Urology* 2013;**82**:572–7.  
34  
35  
36  
37  
38 43 Withington JM, Charman SC, Armitage JN, *et al.* Hospital Volume Does Not Influence  
39 the Safety of Percutaneous Nephrolithotomy in England: A Population-Based Cohort  
40 Study. *J Endourol* 2015;**29**:899–906.  
41  
42  
43  
44 44 Lariviere CA, McAteer JP, Huaco JA, *et al.* Outcomes in pediatric surgery by hospital  
45 volume: A population-based comparison. *Pediatr Surg Int* 2013;**29**:561–70.  
46  
47  
48  
49  
50  
51 45 Eskander A, Merdad M, Irish JC, *et al.* Volume-outcome associations in head and neck  
52 cancer treatment: a systematic review and meta-analysis. *Head Neck* 2014;**36**:1820–  
53  
54  
55  
56 34.  
57  
58  
59  
60

- 1  
2  
3 46 Strom JB, Wimmer NJ, Wasfy JH, *et al.* Association between operator procedure  
4 volume and patient outcomes in percutaneous coronary intervention: a systematic  
5 review and meta-analysis. *Circ Cardiovasc Qual Outcomes* 2014;**7**:560–6.  
6  
7  
8  
9  
10 47 Hata T, Motoi F, Ishida M, *et al.* Effect of hospital volume on surgical outcomes after  
11 pancreaticoduodenectomy. *Ann Surg* 2016;**263**:664–72.  
12  
13  
14 48 Boogaarts HD, van Amerongen MJ, de Vries J, *et al.* Caseload as a factor for outcome  
15 in aneurysmal subarachnoid hemorrhage: a systematic review and meta-analysis. *J*  
16 *Neurosurg* 2014;**120**:605–11.  
17  
18  
19  
20  
21  
22  
23 49 Luft HS, Hunt SS, Maerki SC. The volume-outcome relationship: practice-makes-  
24 perfect or selective-referral patterns? *Health Serv Res* 1987;**22**:157–82.  
25  
26  
27  
28 50 Herr H. A history of partial nephrectomy for renal tumours. *J Urol* 2005;**173**:705–8.  
29  
30  
31 51 Corman JM, Penson DF, Hur K, *et al.* Comparison of complications after radical and  
32 partial nephrectomy: Results from the National Veterans Administration Surgical  
33 Quality Improvement Program. *BJU Int* 2000;**86**:782–9.  
34  
35  
36  
37  
38 52 Hollenbeck BK, Taub D a, Miller DC, *et al.* Use of nephrectomy at select medical  
39 centers--a case of follow the crowd? *J Urol* 2006;**175**:670–4.  
40  
41  
42  
43 53 Nuttall M, Cathcart P, van der Meulen J, *et al.* A description of radical nephrectomy  
44 practice and outcomes in England: 1995-2002. *BJU Int* 2005;**96**:58–61.  
45  
46  
47  
48 54 Fedeli U, Novara G, Alba N, *et al.* Trends from 1999 to 2007 in the surgical treatments  
49 of kidney cancer in Europe: Data from the Veneto Region, Italy. *BJU Int*  
50 2010;**105**:1255–9.  
51  
52  
53  
54  
55  
56 55 Birkmeyer J, Stukel T, Siewers A, *et al.* Surgeon volume and operative mortality in the  
57  
58  
59  
60



- 1  
2  
3 United States. *N Engl J Med* 2003;**349**:2117–27.  
4  
5  
6 56 Brusselsaers N, Mattsson F, Lagergren J. Hospital and surgeon volume in relation to  
7  
8 long-term survival after oesophagectomy: systematic review and meta-analysis. *Gut*  
9  
10 2014;**63**:1393–400.  
11  
12  
13 57 Sahni NR, Dalton M, Cutler DM, *et al.* Surgeon specialization and operative mortality  
14  
15 in United States: retrospective analysis. *BMJ* 2016;**354**:i3571.  
16  
17  
18 58 Birkmeyer JD, Sun Y, Wong SL, *et al.* Hospital volume and late survival after cancer  
19  
20 surgery. *Ann Surg* 2007;**245**:777–83.  
21  
22  
23 59 Gooiker GA, Van Gijn W, Wouters MWJM, *et al.* Systematic review and meta-analysis  
24  
25 of the volume-outcome relationship in pancreatic surgery. *Br J Surg* 2011;**98**:485–94.  
26  
27  
28 60 Berger DH, Ko CY, Spain DA, *et al.* Society of University Surgeons position statement  
29  
30 on the volume-outcome relationship for surgical procedures. *Surgery* 2003;**134**:34–40.  
31  
32  
33  
34  
35  
36  
37  
38  
39  
40  
41  
42  
43  
44  
45  
46  
47  
48  
49  
50  
51  
52  
53  
54  
55  
56  
57  
58  
59  
60

## SUPPORTING INFORMATION CAPTIONS

**Appendix 1.** Preferred Reporting Items for Systematic Reviews and Meta-Analyses (PRISMA) checklist.

**Appendix 2.** Literature search algorithm used in Medline, Embase and the Cochrane Library.

**Appendix 3.** Breakdown of quality assessment scores for each study included in the review.

**Appendix 4.** Results of meta-regression investigating the potential explanatory variables for the heterogeneity in the meta-analyses for mortality in **A.** radical nephrectomy and **B.** partial nephrectomy.

**Appendix 5.** List of excluded studies after full-text review and justifications.

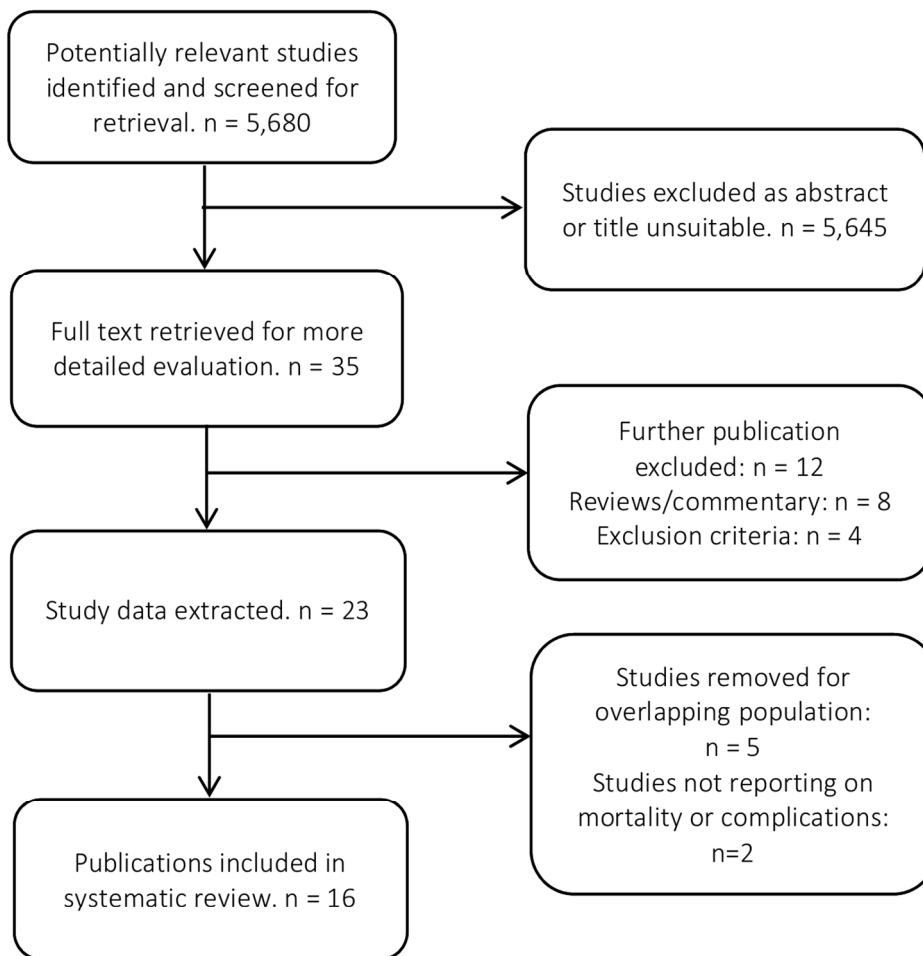

Fig 1. Flow chart of the article selection process.

122x128mm (300 x 300 DPI)

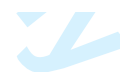



Fig 2. Forest plots displaying the pooled effect estimates of nephrectomy mortality in HV and LV hospitals for A. radical nephrectomy B. partial nephrectomy C. nephrectomy with venous thrombectomy.

100x105mm (300 x 300 DPI)

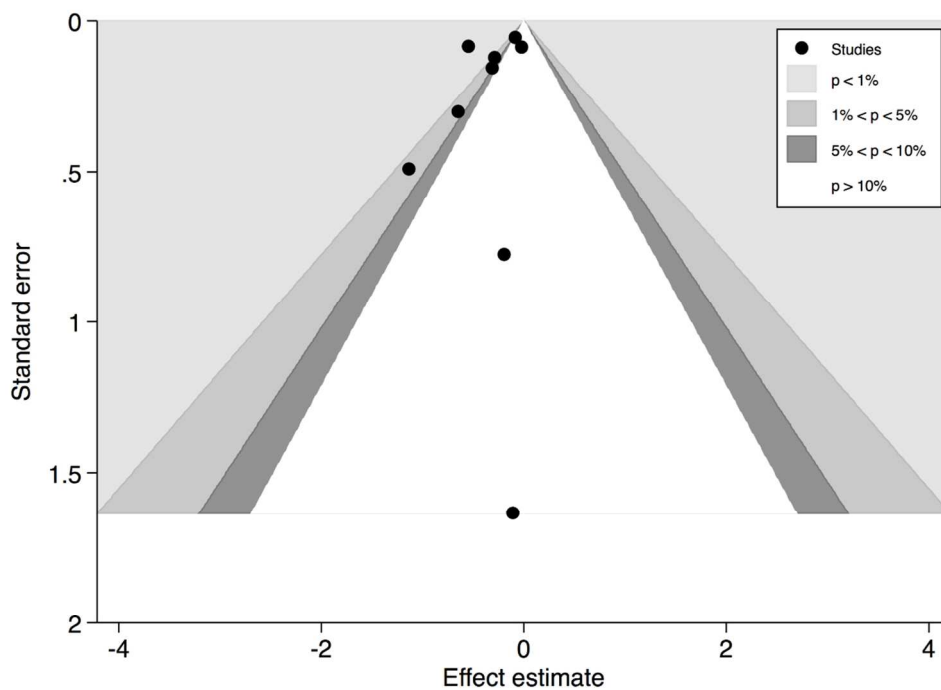

Fig 3. Contour-enhanced funnel plot of studies analysing hospital volume-outcome relationship in radical nephrectomy mortality. Harbord's modified test for funnel plot asymmetry was not statistically significant.

111x80mm (300 x 300 DPI)

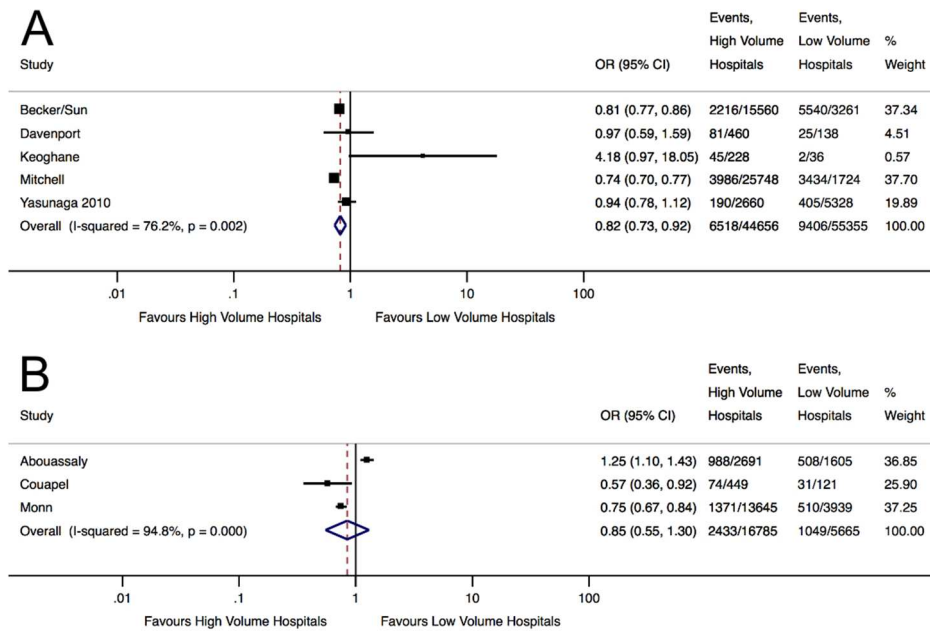

Fig 4. Forest plots displaying the pooled effect estimates of nephrectomy complications in HV and LV hospitals for A. radical nephrectomy B. partial nephrectomy.

101x66mm (300 x 300 DPI)

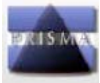

# PRISMA 2009 Checklist

1  
2  
3  
4  
5  
6  
7  
8  
9  
10  
11  
12  
13  
14  
15  
16  
17  
18  
19  
20  
21  
22  
23  
24  
25  
26  
27  
28  
29  
30  
31  
32  
33  
34  
35  
36  
37  
38  
39  
40  
41  
42  
43  
44  
45  
46  
47  
48  
49

| Section/topic                      | #  | Checklist item                                                                                                                                                                                                                                                                                              | Report on page |
|------------------------------------|----|-------------------------------------------------------------------------------------------------------------------------------------------------------------------------------------------------------------------------------------------------------------------------------------------------------------|----------------|
| <b>TITLE</b>                       |    |                                                                                                                                                                                                                                                                                                             |                |
| Title                              | 1  | Identify the report as a systematic review, meta-analysis, or both.                                                                                                                                                                                                                                         | 1              |
| <b>ABSTRACT</b>                    |    |                                                                                                                                                                                                                                                                                                             |                |
| Structured summary                 | 2  | Provide a structured summary including, as applicable: background; objectives; data sources; study eligibility criteria, participants, and interventions; study appraisal and synthesis methods; results; limitations; conclusions and implications of key findings; systematic review registration number. | 2-3            |
| <b>INTRODUCTION</b>                |    |                                                                                                                                                                                                                                                                                                             |                |
| Rationale                          | 3  | Describe the rationale for the review in the context of what is already known.                                                                                                                                                                                                                              | 5              |
| Objectives                         | 4  | Provide an explicit statement of questions being addressed with reference to participants, interventions, comparisons, outcomes, and study design (PICOS).                                                                                                                                                  | 5              |
| <b>METHODS</b>                     |    |                                                                                                                                                                                                                                                                                                             |                |
| Protocol and registration          | 5  | Indicate if a review protocol exists, if and where it can be accessed (e.g., Web address), and, if available, provide registration information including registration number.                                                                                                                               | N/A            |
| Eligibility criteria               | 6  | Specify study characteristics (e.g., PICOS, length of follow-up) and report characteristics (e.g., years considered, language, publication status) used as criteria for eligibility, giving rationale.                                                                                                      | 7              |
| Information sources                | 7  | Describe all information sources (e.g., databases with dates of coverage, contact with study authors to identify additional studies) in the search and date last searched.                                                                                                                                  | 7              |
| Search                             | 8  | Present full electronic search strategy for at least one database, including any limits used, such that it could be repeated.                                                                                                                                                                               | 7              |
| Study selection                    | 9  | State the process for selecting studies (i.e., screening, eligibility, included in systematic review, and, if applicable, included in the meta-analysis).                                                                                                                                                   | 7-9            |
| Data collection process            | 10 | Describe method of data extraction from reports (e.g., piloted forms, independently, in duplicate) and any processes for obtaining and confirming data from investigators.                                                                                                                                  | 7-8            |
| Data items                         | 11 | List and define all variables for which data were sought (e.g., PICOS, funding sources) and any assumptions and simplifications made.                                                                                                                                                                       | 7-8            |
| Risk of bias in individual studies | 12 | Describe methods used for assessing risk of bias of individual studies (including specification of whether this was done at the study or outcome level), and how this information is to be used in any data synthesis.                                                                                      | 8              |
| Summary measures                   | 13 | State the principal summary measures (e.g., risk ratio, difference in means).                                                                                                                                                                                                                               | 9              |
| Synthesis of results               | 14 | Describe the methods of handling data and combining results of studies, if done, including measures of consistency (e.g., $I^2$ ) for each meta-analysis.                                                                                                                                                   | 9-10           |

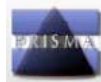

# PRISMA 2009 Checklist

1  
2  
3  
4  
5  
6  
7  
8  
9  
10  
11  
12  
13  
14  
15  
16  
17  
18  
19  
20  
21  
22  
23  
24  
25  
26  
27  
28  
29  
30  
31  
32  
33  
34  
35  
36  
37  
38  
39  
40  
41  
42  
43  
44  
45  
46  
47  
48  
49

| Section/topic                 | #  | Checklist item                                                                                                                                                                                           | Report on page |
|-------------------------------|----|----------------------------------------------------------------------------------------------------------------------------------------------------------------------------------------------------------|----------------|
| Risk of bias across studies   | 15 | Specify any assessment of risk of bias that may affect the cumulative evidence (e.g., publication bias, selective reporting within studies).                                                             | 10             |
| Additional analyses           | 16 | Describe methods of additional analyses (e.g., sensitivity or subgroup analyses, meta-regression), if done, indicating which were pre-specified.                                                         | 10-11          |
| <b>RESULTS</b>                |    |                                                                                                                                                                                                          |                |
| Study selection               | 17 | Give numbers of studies screened, assessed for eligibility, and included in the review, with reasons for exclusions at each stage, ideally with a flow diagram.                                          | 12             |
| Study characteristics         | 18 | For each study, present characteristics for which data were extracted (e.g., study size, PICOS, follow-up period) and provide the citations.                                                             | 12-14          |
| Risk of bias within studies   | 19 | Present data on risk of bias of each study and, if available, any outcome level assessment (see item 12).                                                                                                | 12-14          |
| Results of individual studies | 20 | For all outcomes considered (benefits or harms), present, for each study: (a) simple summary data for each intervention group (b) effect estimates and confidence intervals, ideally with a forest plot. | 15-18          |
| Synthesis of results          | 21 | Present results of each meta-analysis done, including confidence intervals and measures of consistency.                                                                                                  | 15-18          |
| Risk of bias across studies   | 22 | Present results of any assessment of risk of bias across studies (see Item 15).                                                                                                                          | 15-18          |
| Additional analysis           | 23 | Give results of additional analyses, if done (e.g., sensitivity or subgroup analyses, meta-regression [see Item 16]).                                                                                    | 15-19          |
| <b>DISCUSSION</b>             |    |                                                                                                                                                                                                          |                |
| Summary of evidence           | 24 | Summarize the main findings including the strength of evidence for each main outcome; consider their relevance to key groups (e.g., healthcare providers, users, and policy makers).                     | 20             |
| Limitations                   | 25 | Discuss limitations at study and outcome level (e.g., risk of bias), and at review-level (e.g., incomplete retrieval of identified research, reporting bias).                                            | 21-23          |
| Conclusions                   | 26 | Provide a general interpretation of the results in the context of other evidence, and implications for future research.                                                                                  | 21-25          |
| <b>FUNDING</b>                |    |                                                                                                                                                                                                          |                |
| Funding                       | 27 | Describe sources of funding for the systematic review and other support (e.g., supply of data); role of funders for the systematic review.                                                               | 27             |

From: Moher D, Liberati A, Tetzlaff J, Altman DG, The PRISMA Group (2009). Preferred Reporting Items for Systematic Reviews and Meta-Analyses: The PRISMA Statement. PLoS Med 6(7): e100097  
doi:10.1371/journal.pmed1000097

For more information, visit: [www.prisma-statement.org](http://www.prisma-statement.org).



**Appendix 2.** Literature search algorithm for Medline, Embase and the Cochrane Library.

**Medline**

**Nephrectomy Terms:**

1. exp Nephrectomy/
2. nephrectom\*.mp.
3. (kidney\* adj5 (excision\* or remov\*)).mp.
4. 1 or 2 or 3

**Surgeon or Hospital Volume Terms**

5. ((physician\* or urol\* or surg\* or operat\* or hospital\* or procedure\*) adj5 (volume\* or workload\* or caseload\* or performance\* or number\*)).mp.
6. exp Hospitals/
7. exp Surgeons/
8. (volume\* or workload\* or caseload\* or performance\*).mp.
9. exp Workload/
10. 6 and 8
11. 7 and 8
12. 6 and 9
13. 7 and 9
14. exp Centralized Hospital Services/
15. centrali\*ation.mp.
16. 5 or 8 or 9 or 10 or 11 or 12 or 13 or 14 or 15

**Outcome Terms**

17. exp "Outcome Assessment (Health Care)"/
18. exp Patient Outcome Assessment/
19. exp "Outcome and Process Assessment (Health Care)"/
20. outcome.mp.
21. exp Treatment Outcome/
22. exp Mortality/
23. mortalit\*.mp.
24. exp Morbidity/
25. morbidit\*.mp.
26. exp "Length of Stay"/
27. length of stay.mp.
28. ((duration or length or period) adj5 (stay or hospital\*)).mp.
29. exp Survival/
30. survival.mp.
31. exp Patient Readmission/
32. readmission.mp.
33. exp Postoperative Complications/
34. complication\*.mp.
35. 17 or 18 or 19 or 20 or 21 or 22 or 23 or 24 or 25 or 26 or 27 or 28 or 29 or 30 or 31 or 32 or 33 or 34
36. 4 and 16 and 35

**Embase**

**Nephrectomy Terms:**

1. exp Nephrectomy/
2. exp Partial nephrectomy/
3. exp "Patient history of nephrectomy"/
4. nephrectom\*.mp.
5. (kidney\* adj5 (excision\* or remov\*)).mp.
6. 1 or 2 or 3 or 4 or 5

**Surgeon or Hospital Volume Terms**

7. ((physician\* or urol\* or surg\* or operat\* or hospital\* or procedure\*) adj5 (volume\* or workload\* or caseload\* or performance\* or number\*)).mp.
8. exp Hospital/

9. exp Surgeon/
10. (volume\* or workload\* or caseload\* or performance\*).mp.
11. exp Workload/
12. 8 and 10
13. 9 and 10
14. 8 and 11
15. 9 and 11
16. exp Centralization/
17. centrali\*ation.mp.
18. 7 or 10 or 11 or 12 or 13 or 14 or 15 or 16 or 17

#### Outcome Terms

19. exp Outcome Assessment/
20. exp Treatment Outcome/
21. outcome.mp.
22. exp Mortality/
23. mortalit\*.mp.
24. exp Morbidity/
25. morbidit\*.mp.
26. exp "Length of Stay"/
27. length of stay.mp.
28. ((duration or length or period) adj5 (stay or hospital\*)).mp.
29. exp Survival/
30. survival.mp.
31. exp Hospital readmission/
32. readmission.mp.
33. exp Postoperative Complications/
34. complication\*.mp.
35. 19 or 20 or 21 or 22 or 23 or 24 or 25 or 26 or 27 or 28 or 29 or 30 or 31 or 32 or 33 or 34
36. 6 and 18 and 35

#### Cochrane Library

##### Nephrectomy Terms:

1. exp Nephrectomy/
2. nephrectom\*
3. kidney\* near (excision\* or remov\*)
4. 1 or 2 or 3

##### Surgeon or Hospital Volume Terms

5. (physician\* or urol\* or surg\* or operat\* or hospital\* or procedure\*) near (volume\* or workload\* or caseload\* or performance\* or number\*)
6. exp Hospitals/
7. exp Surgeons/
8. volume\* or workload\* or caseload\* or performance\*
9. exp Workload/
10. 6 and 8
11. 7 and 8
12. 6 and 9
13. 7 and 9
14. exp Centralized Hospital Services/
15. centrali\*ation
16. 5 or 8 or 9 or 10 or 11 or 12 or 13 or 14 or 15

#### Outcome Terms

17. exp "Outcome Assessment (Health Care)"/
18. exp Patient Outcome Assessment/
19. exp "Outcome and Process Assessment (Health Care)"/
20. outcome
21. exp Treatment Outcome/
22. exp Mortality/

- 1
- 2
- 3
- 4 23. mortalit\*
- 5 24. exp Morbidity/
- 6 25. morbidit\*
- 7 26. exp "Length of Stay"/
- 8 27. length of stay
- 9 28. (duration or length or period) near (stay or hospital\*)
- 10 29. exp Survival/
- 11 30. survival
- 12 31. exp Patient Readmission/
- 13 32. readmission
- 14 33. exp Postoperative Complications/
- 15 34. complication\*
- 16 35. 17 or 18 or 19 or 20 or 21 or 22 or 23 or 24 or 25 or 26 or 27 or 28 or 29 or 30 or 31 or 32 or 33 or 34
- 17 36. 4 and 16 and 35
- 18
- 19
- 20
- 21
- 22
- 23
- 24
- 25
- 26
- 27
- 28
- 29
- 30
- 31
- 32
- 33
- 34
- 35
- 36
- 37
- 38
- 39
- 40
- 41
- 42
- 43
- 44
- 45
- 46
- 47
- 48
- 49
- 50
- 51
- 52
- 53
- 54
- 55
- 56
- 57
- 58
- 59
- 60

1  
2  
3  
4  
5  
6  
7  
8  
9  
10  
11  
12  
13  
14  
15  
16  
17  
18  
19  
20  
21  
22  
23  
24  
25  
26  
27  
28  
29  
30  
31  
32  
33  
34  
35  
36  
37  
38  
39  
40  
41  
42  
43  
44  
45  
46  
47

**Appendix 3.** Breakdown of quality assessment scores for each study included in the review.

| Author            | Cohort representative (1) | Number of hospital/ surgeons (2) | Sample size (1) | Number of adverse events (2) | Unit of analysis (3) | Patient selection appropriate (2) | Volume categories (1) | Risk adjustment (3) | Clinical processes of care (2) | Outcomes (1) | Total (18) |
|-------------------|---------------------------|----------------------------------|-----------------|------------------------------|----------------------|-----------------------------------|-----------------------|---------------------|--------------------------------|--------------|------------|
| Alle et al        | 1                         | 1                                | 1               | 1                            | 0                    | 1                                 | 1                     | 2                   | 0                              | 0            | 8          |
| Chacker/Sun et al | 1                         | 2                                | 1               | 2                            | 0                    | 0                                 | 1                     | 1                   | 0                              | 1            | 9          |
| Guapel et al      | 0                         | 2                                | 0               | 1                            | 0                    | 0                                 | 1                     | 2                   | 1                              | 1            | 8          |
| Donn et al        | 1                         | 2                                | 1               | 2                            | 0                    | 0                                 | 1                     | 1                   | 0                              | 1            | 9          |
| Green et al       | 1                         | 2                                | 0               | 2                            | 3                    | 0                                 | 1                     | 1                   | 0                              | 1            | 11         |
| Guassaly et al    | 1                         | 2                                | 1               | 2                            | 3                    | 0                                 | 1                     | 1                   | 0                              | 1            | 12         |
| Pop et al         | 1                         | 2                                | 0               | 1                            | 2                    | 0                                 | 1                     | 3                   | 0                              | 1            | 11         |
| Chanale et al     | 1                         | 2                                | 1               | 2                            | 0                    | 0                                 | 1                     | 1                   | 0                              | 1            | 9          |
| Sunaga et al      | 1                         | 2                                | 1               | 2                            | 0                    | 0                                 | 1                     | 1                   | 0                              | 1            | 9          |
| itchell et al     | 1                         | 2                                | 1               | 2                            | 0                    | 0                                 | 1                     | 1                   | 0                              | 1            | 9          |
| Sunaga et al 2008 | 0                         | 2                                | 1               | 2                            | 2                    | 0                                 | 1                     | 2                   | 0                              | 1            | 11         |
| venport et al     | 0                         | 2                                | 0               | 1                            | 0                    | 0                                 | 0                     | 0                   | 0                              | 1            | 4          |
| goghane et al     | 0                         | 1                                | 0               | 1                            | 0                    | 0                                 | 0                     | 0                   | 0                              | 1            | 3          |
| ub et al          | 1                         | 2                                | 1               | 2                            | 0                    | 0                                 | 1                     | 1                   | 0                              | 1            | 9          |
| kmeyer et al      | 0                         | 2                                | 1               | 2                            | 0                    | 0                                 | 1                     | 1                   | 0                              | 0            | 7          |

**Appendix 4.** Results of meta-regression investigating the heterogeneity in the meta-analyses for mortality and its potential explanatory variables in **A.** radical nephrectomy and **B.** partial nephrectomy.

**A.**

| Explanatory Variable       | Regression Coefficient | 95% Confidence Interval | p Value |
|----------------------------|------------------------|-------------------------|---------|
| Study year                 | 0.96                   | 0.88, 1.04              | 0.24    |
| Country of Study           |                        |                         |         |
| England                    | 1.46                   | 0.70-3.02               | 0.24    |
| Japan                      | 0.76                   | 0.28-2.04               | 0.50    |
| Norway                     | 0.42                   | 0.10-1.76               | 0.18    |
| USA                        | 1.06                   | 0.51, 2.21              | 0.85    |
| Data type                  |                        |                         |         |
| Administrative             | 1.36                   | 0.71, 2.61              | 0.28    |
| Clinical                   | 0.74                   | 0.38, 1.32              | 0.28    |
| Number of patients         | 1.00                   | 1.00, 1.00              | 0.45    |
| Number of hospitals        | 1.00                   | 1.00, 1.00              | 0.14    |
| Patient age (mean)         | 0.92                   | 0.70, 1.19              | 0.36    |
| Patient gender (% of male) | 0.96                   | 0.88, 1.05              | 0.25    |
| Threshold for HV hospitals | 0.99                   | 0.99, 1.00              | 0.01    |

**B.**

| Explanatory Variable       | Regression Coefficient | 95% Confidence Interval | p Value |
|----------------------------|------------------------|-------------------------|---------|
| Study year                 | 0.96                   | 0.80, 1.14              | 0.51    |
| Country of Study           |                        |                         |         |
| England                    | 1.42                   | 0.46, 4.27              | 0.40    |
| Japan                      | 1.19                   | 0.67, 2.13              | 0.41    |
| USA                        | 0.80                   | 0.51, 1.26              | 0.22    |
| Data type                  |                        |                         |         |
| Administrative             | 1.09                   | 0.61, 1.97              | 0.66    |
| Clinical                   | 0.91                   | 0.51, 1.65              | 0.66    |
| Number of patients         | 1.00                   | 1.00, 1.00              | 0.26    |
| Number of hospitals        | 1.00                   | 0.99, 1.00              | 0.80    |
| Patient age (mean)         | 1.04                   | 0.97, 1.11              | 0.16    |
| Patient gender (% of male) | 0.99                   | 0.80, 1.23              | 0.87    |
| Threshold for HV hospitals | 1.00                   | 0.93, 1.07              | 0.83    |

**Appendix 5.** List of excluded studies after full-text review and justifications.

| Reference                                                                                                                                                                                                                                                             | Justification                                          |
|-----------------------------------------------------------------------------------------------------------------------------------------------------------------------------------------------------------------------------------------------------------------------|--------------------------------------------------------|
| 1. Joudi FN, Konety BR. The impact of provider volume on outcomes from urological cancer therapy. <i>J Urol</i> . 2005;174(2):432-438.                                                                                                                                | Review                                                 |
| 2. Joudi FN, Konety BR. The volume/outcome relationship in urologic cancer surgery. <i>Support Cancer Ther</i> . 2004;2(1):42-46.                                                                                                                                     | Review                                                 |
| 3. Killen SD, O'Sullivan MJ, Coffey JC, Kirwan WO RH. Provider volume and outcomes for oncological procedures. <i>Br J Surg</i> . 2005;92:389-402.                                                                                                                    | Review                                                 |
| 4. Mayer EK, Purkayastha S, Athanasiou T, Darzi A, Vale JA. Assessing the quality of the volume-outcome relationship in uro-oncology. <i>BJU Int</i> . 2009;103(3):341-349.                                                                                           | Review                                                 |
| 5. Nuttall M, Vandermeulen J, Phillips N, et al. a Systematic Review and Critique of the Literature Relating Hospital or Surgeon Volume To Health Outcomes for 3 Urological Cancer Procedures. <i>J Urol</i> . 2004;172(6):2145-2152.                                 | Review                                                 |
| 6. Peyronnet B, Couapel J-P, Patard J-J, Bensalah K. Relationship between surgical volume and outcomes in nephron-sparing surgery. <i>Curr Opin Urol</i> . 2014;24(5):453-458.                                                                                        | Review                                                 |
| 7. Pieper D, Mathes T, Neugebauer E, Eikermann M. State of evidence on the relationship between high-volume hospitals and outcomes in surgery: a systematic review of systematic reviews. <i>J Am Coll Surg</i> . 2013;216(5):1015-1025.                              | Review                                                 |
| 8. Penson DF. Mortality after major surgery for urologic cancers in specialized urology hospitals: are they any better? <i>Urol Oncol</i> . 2006;24(5):460.                                                                                                           | Commentary                                             |
| 9. Sugihara T, Yasunaga H, Horiguchi H, et al. Performance comparisons in major uro-oncological surgeries between the USA and Japan. <i>Int J Urol</i> . 2014;21(11):1145-1150.                                                                                       | Volume-outcome relationship not described              |
| 10. Fernando A, Fowler S, O'Brien T, et al. Nephron-sparing surgery across a nation - Outcomes from the British Association of Urological Surgeons 2012 national partial nephrectomy audit. <i>BJU Int</i> . 2016;117(6):874-82.                                      | Volume-outcome relationship not described              |
| 11. Wang HH, Tejwani R, Zhang H, Wiener JS, Routh JC. Hospital Surgical Volume and Associated Postoperative Complications of Pediatric Urological Surgery in the United States. <i>J Urol</i> . 2015;194(2):506-511.                                                  | Paediatric cohort                                      |
| 12. Tinay I, Gelpi-Hammerschmidt F, Leow JJ, et al. Trends in utilisation, perioperative outcomes, and costs of nephroureterectomies in the management of upper tract urothelial carcinoma: A 10-year population-based analysis. <i>BJU Int</i> . 2016;117(6):954-60. | Volume-outcome relationship in nephroureterectomy only |
| 13. Gilbert SM, Dunn RL, Miller DC, Daignault S, Ye Z, Hollenbeck BK. Mortality After Urologic Cancer Surgery: Impact of Non-index Case Volume. <i>Urology</i> . 2008;71(5):906-910.                                                                                  | Overlapping studied period. Eliminated as per rule 2.  |
| 14. Joudi FN, Allareddy V, Kane CJ, Konety BR. Analysis of complications following partial and total nephrectomy for renal cancer in a population based sample. <i>J Urol</i> . 2007;177(5):1709-1714.                                                                | Overlapping studied period. Eliminated as per rule 2.  |
| 15. Konety BR, Allareddy V, Modak S, Smith B. Mortality after major surgery for urologic cancers in specialized urology hospitals: are they any better? <i>J Clin Oncol</i> . 2006;24(13):2006-2012.                                                                  | Overlapping studied period. Eliminated as per rule 2.  |
| 16. Trinh QD, Schmitges J, Sun M, et al. Does partial nephrectomy at an academic institution result in better outcomes? <i>World J Urol</i> . 2012;30(4):505-510.                                                                                                     | Overlapping studied period. Eliminated as per rule 2.  |
| 17. Finlayson EVA, Goodney PP, Birkmeyer JD. Hospital volume and operative mortality in cancer surgery: a national study. <i>Arch Surg</i> . 2003;138(7):721-726.                                                                                                     | Overlapping studied period. Eliminated as per rule 4.  |
| 18. Goodney PP, Stukel TA, Lucas FL, Finlayson EVA, Birkmeyer JD. Hospital volume, length of stay, and readmission rates in high-risk surgery. <i>Ann Surg</i> . 2003;238(2):161-7.                                                                                   | Did not report on mortality/complications              |
| 19. Porpiglia F, Mari A, Bertolo R, Antonelli A, Bianchi G, Fidanza F, et al. Partial Nephrectomy in Clinical T1b Renal Tumors: Multicenter Comparative Study of Open, Laparoscopic and Robot-assisted Approach (the RECORd Project). <i>Urology</i> . 2016;89:45-51. | Did not report on mortality/complications              |
