# Supplementary material for: Influence of hospital volume on nephrectomy mortality and complications: a systematic review and meta-analysis stratified by surgical type
Source: PubMed Central journal article supplement — BMJ Open. 2017 Sep 5;7(9):e016833. doi: 10.1136/bmjopen-2017-016833 (PMC5588977; doi:10.1136/bmjopen-2017-016833), 2017-09-05
Supplement: bmjopen-2017-016833supp002.pdf [file bmjopen-2017-016833supp002.pdf]

## Appendix 2. Literature search algorithm for Medline, Embase and the Cochrane Library.

### Medline

#### **Nephrectomy Terms:**

1. exp Nephrectomy/
2. nephrectom\*.mp.
3. (kidney\* adj5 (excision\* or remov\*)).mp.
4. 1 or 2 or 3

#### **Surgeon or Hospital Volume Terms**

5. ((physician\* or urol\* or surg\* or operat\* or hospital\* or procedure\*) adj5 (volume\* or workload\* or caseload\* or performance\* or number\*)).mp.
6. exp Hospitals/
7. exp Surgeons/
8. (volume\* or workload\* or caseload\* or performance\*).mp.
9. exp Workload/
10. 6 and 8
11. 7 and 8
12. 6 and 9
13. 7 and 9
14. exp Centralized Hospital Services/
15. centralization.mp.
16. 5 or 8 or 9 or 10 or 11 or 12 or 13 or 14 or 15

#### **Outcome Terms**

17. exp "Outcome Assessment (Health Care)"/
18. exp Patient Outcome Assessment/
19. exp "Outcome and Process Assessment (Health Care)"/
20. outcome.mp.
21. exp Treatment Outcome/
22. exp Mortality/
23. mortalit\*.mp.
24. exp Morbidity/
25. morbidit\*.mp.
26. exp "Length of Stay"/
27. length of stay.mp.
28. ((duration or length or period) adj5 (stay or hospital\*)).mp.
29. exp Survival/
30. survival.mp.
31. exp Patient Readmission/
32. readmission.mp.
33. exp Postoperative Complications/
34. complication\*.mp.
35. 17 or 18 or 19 or 20 or 21 or 22 or 23 or 24 or 25 or 26 or 27 or 28 or 29 or 30 or 31 or 32 or 33 or 34
36. 4 and 16 and 35

### Embase

#### **Nephrectomy Terms:**

1. exp Nephrectomy/
2. exp Partial nephrectomy/
3. exp "Patient history of nephrectomy"/
4. nephrectom\*.mp.
5. (kidney\* adj5 (excision\* or remov\*)).mp.
6. 1 or 2 or 3 or 4 or 5

#### **Surgeon or Hospital Volume Terms**

7. ((physician\* or urol\* or surg\* or operat\* or hospital\* or procedure\*) adj5 (volume\* or workload\* or caseload\* or performance\* or number\*)).mp.
8. exp Hospital/

9. exp Surgeon/
10. (volume\* or workload\* or caseload\* or performance\*).mp.
11. exp Workload/
12. 8 and 10
13. 9 and 10
14. 8 and 11
15. 9 and 11
16. exp Centralization/
17. centrali\*ation.mp.
18. 7 or 10 or 11 or 12 or 13 or 14 or 15 or 16 or 17

#### **Outcome Terms**

19. exp Outcome Assessment/
20. exp Treatment Outcome/
21. outcome.mp.
22. exp Mortality/
23. mortalit\*.mp.
24. exp Morbidity/
25. morbidit\*.mp.
26. exp "Length of Stay"/
27. length of stay.mp.
28. ((duration or length or period) adj5 (stay or hospital\*)).mp.
29. exp Survival/
30. survival.mp.
31. exp Hospital readmission/
32. readmission.mp.
33. exp Postoperative Complications/
34. complication\*.mp.
35. 19 or 20 or 21 or 22 or 23 or 24 or 25 or 26 or 27 or 28 or 29 or 30 or 31 or 32 or 33 or 34
36. 6 and 18 and 35

#### **Cochrane Library**

##### **Nephrectomy Terms:**

1. exp Nephrectomy/
2. nephrectom\*
3. kidney\* near (excision\* or remov\*)
4. 1 or 2 or 3

##### **Surgeon or Hospital Volume Terms**

5. (physician\* or urol\* or surg\* or operat\* or hospital\* or procedure\*) near (volume\* or workload\* or caseload\* or performance\* or number\*)
6. exp Hospitals/
7. exp Surgeons/
8. volume\* or workload\* or caseload\* or performance\*
9. exp Workload/
10. 6 and 8
11. 7 and 8
12. 6 and 9
13. 7 and 9
14. exp Centralized Hospital Services/
15. centrali\*ation
16. 5 or 8 or 9 or 10 or 11 or 12 or 13 or 14 or 15

##### **Outcome Terms**

17. exp "Outcome Assessment (Health Care)"/
18. exp Patient Outcome Assessment/
19. exp "Outcome and Process Assessment (Health Care)"/
20. outcome
21. exp Treatment Outcome/
22. exp Mortality/

23. mortalit\*
24. exp Morbidity/
25. morbidit\*
26. exp "Length of Stay"/
27. length of stay
28. (duration or length or period) near (stay or hospital\*)
29. exp Survival/
30. survival
31. exp Patient Readmission/
32. readmission
33. exp Postoperative Complications/
34. complication\*
35. 17 or 18 or 19 or 20 or 21 or 22 or 23 or 24 or 25 or 26 or 27 or 28 or 29 or 30 or 31 or 32 or 33 or 34
36. 4 and 16 and 35
