# Supplementary material for: Influence of hospital volume on nephrectomy mortality and complications: a systematic review and meta-analysis stratified by surgical type
Source: PubMed Central journal article supplement — BMJ Open. 2017 Sep 5;7(9):e016833. doi: 10.1136/bmjopen-2017-016833 (PMC5588977; doi:10.1136/bmjopen-2017-016833), 2017-09-05
Supplement: bmjopen-2017-016833supp004.pdf [file bmjopen-2017-016833supp004.pdf]

**Appendix 4.** Breakdown of quality assessment scores for each study included in the review.

| Author            | Cohort representative (1) | Number of hospital/surgeons (2) | Sample size (1) | Number of adverse events (2) | Unit of analysis (3) | Patient selection appropriate (2) | Volume categories (1) | Risk adjustment (3) | Clinical processes of care (2) | Outcomes (1) | Total (18) |
|-------------------|---------------------------|---------------------------------|-----------------|------------------------------|----------------------|-----------------------------------|-----------------------|---------------------|--------------------------------|--------------|------------|
| Alle et al        | 1                         | 1                               | 1               | 1                            | 0                    | 1                                 | 1                     | 2                   | 0                              | 0            | 8          |
| Becker/Sun et al  | 1                         | 2                               | 1               | 2                            | 0                    | 0                                 | 1                     | 1                   | 0                              | 1            | 9          |
| Guapel et al      | 0                         | 2                               | 0               | 1                            | 0                    | 0                                 | 1                     | 2                   | 1                              | 1            | 8          |
| Donn et al        | 1                         | 2                               | 1               | 2                            | 0                    | 0                                 | 1                     | 1                   | 0                              | 1            | 9          |
| Green et al       | 1                         | 2                               | 0               | 2                            | 3                    | 0                                 | 1                     | 1                   | 0                              | 1            | 11         |
| Jouassaly et al   | 1                         | 2                               | 1               | 2                            | 3                    | 0                                 | 1                     | 1                   | 0                              | 1            | 12         |
| Leip et al        | 1                         | 2                               | 0               | 1                            | 2                    | 0                                 | 1                     | 3                   | 0                              | 1            | 11         |
| Manchale et al    | 1                         | 2                               | 1               | 2                            | 0                    | 0                                 | 1                     | 1                   | 0                              | 1            | 9          |
| Munaga et al 2010 | 1                         | 2                               | 1               | 2                            | 0                    | 0                                 | 1                     | 1                   | 0                              | 1            | 9          |
| Nitchell et al    | 1                         | 2                               | 1               | 2                            | 0                    | 0                                 | 1                     | 1                   | 0                              | 1            | 9          |
| Munaga et al 2008 | 0                         | 2                               | 1               | 2                            | 2                    | 0                                 | 1                     | 2                   | 0                              | 1            | 11         |
| Northport et al   | 0                         | 2                               | 0               | 1                            | 0                    | 0                                 | 0                     | 0                   | 0                              | 1            | 4          |
| Yoghane et al     | 0                         | 1                               | 0               | 1                            | 0                    | 0                                 | 0                     | 0                   | 0                              | 1            | 3          |
| Hub et al         | 1                         | 2                               | 1               | 2                            | 0                    | 0                                 | 1                     | 1                   | 0                              | 1            | 9          |
| Markmeyer et al   | 0                         | 2                               | 1               | 2                            | 0                    | 0                                 | 1                     | 1                   | 0                              | 0            | 7          |
