# Supplementary material for: Influence of hospital volume on nephrectomy mortality and complications: a systematic review and meta-analysis stratified by surgical type
Source: PubMed Central journal article supplement — BMJ Open. 2017 Sep 5;7(9):e016833. doi: 10.1136/bmjopen-2017-016833 (PMC5588977; doi:10.1136/bmjopen-2017-016833), 2017-09-05
Supplement: bmjopen-2017-016833supp005.pdf [file bmjopen-2017-016833supp005.pdf]

**Appendix 5.** Results of meta-regression investigating the heterogeneity in the meta-analyses for mortality and its potential explanatory variables in **A.** radical nephrectomy and **B.** partial nephrectomy.

**A.**

| <b>Explanatory Variable</b> | <b>Regression Coefficient</b> | <b>95% Confidence Interval</b> | <b>p Value</b> |
|-----------------------------|-------------------------------|--------------------------------|----------------|
| Study year                  | 0.96                          | 0.88, 1.04                     | 0.24           |
| Country of Study            |                               |                                |                |
| England                     | 1.46                          | 0.70-3.02                      | 0.24           |
| Japan                       | 0.76                          | 0.28-2.04                      | 0.50           |
| Norway                      | 0.42                          | 0.10-1.76                      | 0.18           |
| USA                         | 1.06                          | 0.51, 2.21                     | 0.85           |
| Data type                   |                               |                                |                |
| Administrative              | 1.36                          | 0.71, 2.61                     | 0.28           |
| Clinical                    | 0.74                          | 0.38, 1.32                     | 0.28           |
| Number of patients          | 1.00                          | 1.00, 1.00                     | 0.45           |
| Number of hospitals         | 1.00                          | 1.00, 1.00                     | 0.14           |
| Patient age (mean)          | 0.92                          | 0.70, 1.19                     | 0.36           |
| Patient gender (% of male)  | 0.96                          | 0.88, 1.05                     | 0.25           |
| Threshold for HV hospitals  | 0.99                          | 0.99, 1.00                     | 0.01           |

**B.**

| <b>Explanatory Variable</b> | <b>Regression Coefficient</b> | <b>95% Confidence Interval</b> | <b>p Value</b> |
|-----------------------------|-------------------------------|--------------------------------|----------------|
| Study year                  | 0.96                          | 0.80, 1.14                     | 0.51           |
| Country of Study            |                               |                                |                |
| England                     | 1.42                          | 0.46, 4.27                     | 0.40           |
| Japan                       | 1.19                          | 0.67, 2.13                     | 0.41           |
| USA                         | 0.80                          | 0.51, 1.26                     | 0.22           |
| Data type                   |                               |                                |                |
| Administrative              | 1.09                          | 0.61, 1.97                     | 0.66           |
| Clinical                    | 0.91                          | 0.51, 1.65                     | 0.66           |
| Number of patients          | 1.00                          | 1.00, 1.00                     | 0.26           |
| Number of hospitals         | 1.00                          | 0.99, 1.00                     | 0.80           |
| Patient age (mean)          | 1.04                          | 0.97, 1.11                     | 0.16           |
| Patient gender (% of male)  | 0.99                          | 0.80, 1.23                     | 0.87           |
| Threshold for HV hospitals  | 1.00                          | 0.93, 1.07                     | 0.83           |
